# Supplementary material for: Assessing the Potential of Untargeted SWATH Mass Spectrometry-Based Metabolomics to Differentiate Closely Related Exposures in Observational Studies
Source: MDPI journal article supplement (doi:10.3390/metabo12100942), 2022-10-04
Supplement: s1 [file s1]

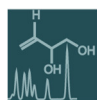

## Supplementary Material

**Supplemental Table S1.** Overview of internal standards.

| Chemical      | Isotope label                           | Supplier                   | Catalogue number |
|---------------|-----------------------------------------|----------------------------|------------------|
| Acetaminophen | ring-D <sub>4</sub>                     | Toronto Research Chemicals | A161222          |
| Diclofenac    | ring- <sup>13</sup> C <sub>6</sub>      | Sigma-Aldrich              | 35361            |
| Naproxen      | methoxy-D <sub>3</sub>                  | Sigma-Aldrich              | 32104            |
| Caffeine      | trimethyl- <sup>13</sup> C <sub>3</sub> | Sigma-Aldrich              | C-082            |
| Cotinine      | N-methyl-D <sub>3</sub>                 | Sigma-Aldrich              | C-035            |

**Supplemental Table S2.** Overview of LC-MS analytical parameters.

| Setting                           | Value                                                                                                                                      |
|-----------------------------------|--------------------------------------------------------------------------------------------------------------------------------------------|
| <i>Analytical setup:</i>          |                                                                                                                                            |
| LC pump                           | Dionex Ultimate 3000 RS Binary Pump (Cat. No. HPG-3400RS)                                                                                  |
| LC autosampler                    | Dionex Ultimate 3000 TS Autosampler (Cat. No. WPS-3000TRS)                                                                                 |
| LC column oven                    | Dionex Ultimate 3000 RS Column Compartment (Cat. No. TCC-3000RS)                                                                           |
| LC operation software             | Dionex Chromeleon Software (version 6.80 SR10, Build 2818)                                                                                 |
| MS instrument                     | SCIEX TripleTOF® 5600 Mass Spectrometer (Cat. No. 1032150)                                                                                 |
| MS calibration device             | SCIEX Calibrant Delivery System (Cat. No. ISG-002019)                                                                                      |
| MS operation software             | SCIEX Analyst TF Software (version 1.7.1, Build 1163)                                                                                      |
| <i>LC parameters:</i>             |                                                                                                                                            |
| Autosampler temperature           | 6 °C                                                                                                                                       |
| Column temperature                | 40 °C                                                                                                                                      |
| Analytical column                 | Dr. Maisch ReproSil Gold 120, 2.5 µm, 120 Å, 2.0 × 150 mm (Cat. No. r125.9g.s1502)                                                         |
| Trapping column                   | Dr. Maisch ReproSil-Pur 120 C18-AQ, 2.4 µm, 120 Å, 2.0 × 5 mm (Cat. No. r124.aq.v0002)                                                     |
| Mobile phase A                    | 5 mM ammonium formate (Fluka; Cat. No. 17843) and 0.1% formic acid (Merck; Cat. No. 1.00264.0100) in water (Chemsolute; Cat. No. 470.2500) |
| Mobile phase B                    | Methanol (Fisher Science; Cat. No. M/4058/17)                                                                                              |
| Trapping settings                 | 0.3 mL/min at 2% B                                                                                                                         |
| Flow rate                         | 0.3 mL/min                                                                                                                                 |
| LC program                        | 0.00 min: 5% B                                                                                                                             |
|                                   | 0.20 min: column switch                                                                                                                    |
|                                   | 0.50 min: 5% B                                                                                                                             |
|                                   | 12.50 min: 80% B                                                                                                                           |
|                                   | 14.00 min: 100% B                                                                                                                          |
|                                   | 17.00 min: 100% B                                                                                                                          |
|                                   | 17.01 min: 5% B                                                                                                                            |
| <i>MS parameter:</i>              | 19.00 min: 5% B                                                                                                                            |
|                                   | Source temperature (TEM)                                                                                                                   |
|                                   | 500 °C                                                                                                                                     |
|                                   | Curtain gas (CUR)                                                                                                                          |
|                                   | 35 psi                                                                                                                                     |
|                                   | Nebulizer gas (GS1)                                                                                                                        |
|                                   | 40 psi                                                                                                                                     |
|                                   | Heater gas (GS2)                                                                                                                           |
|                                   | 40 psi                                                                                                                                     |
|                                   | IonSpray voltage floating (ISVF)                                                                                                           |
|                                   | 5,200 V                                                                                                                                    |
|                                   | Declustering potential (DP)                                                                                                                |
|                                   | 80 V                                                                                                                                       |
|                                   | Collision energy (CE) MS1                                                                                                                  |
|                                   | 10 V                                                                                                                                       |
|                                   | Collision energy (CE) MS2                                                                                                                  |
|                                   | 40 V                                                                                                                                       |
|                                   | Collision energy spread (CES) MS1                                                                                                          |
|                                   | 0 V                                                                                                                                        |
|                                   | Collision energy spread (CES) MS2                                                                                                          |
|                                   | 30 V                                                                                                                                       |
|                                   | Accumulation time MS1                                                                                                                      |
|                                   | 50 ms                                                                                                                                      |
|                                   | Accumulation time MS2                                                                                                                      |
|                                   | 23 ms                                                                                                                                      |
|                                   | TOF MS1 range                                                                                                                              |
|                                   | m/z 100-1,250                                                                                                                              |
|                                   | TOF MS2 range                                                                                                                              |
|                                   | m/z 40-1,250                                                                                                                               |
| SWATH precursor isolation windows | Experiment 1: m/z 100-115                                                                                                                  |
|                                   | Experiment 2: m/z 114-129                                                                                                                  |
|                                   | Experiment 3: m/z 128-143                                                                                                                  |
|                                   | Experiment 4: m/z 142-157                                                                                                                  |
|                                   | Experiment 5: m/z 156-171                                                                                                                  |

Experiment 6: m/z 170-185  
Experiment 7: m/z 184-199  
Experiment 8: m/z 198-213  
Experiment 9: m/z 212-227  
Experiment 10: m/z 226-241  
Experiment 11: m/z 240-255  
Experiment 12: m/z 254-269  
Experiment 13: m/z 268-283  
Experiment 14: m/z 282-297  
Experiment 15: m/z 296-311  
Experiment 16: m/z 310-325  
Experiment 17: m/z 324-339  
Experiment 18: m/z 338-353  
Experiment 19: m/z 352-367  
Experiment 20: m/z 366-381  
Experiment 21: m/z 380-395  
Experiment 22: m/z 394-409  
Experiment 23: m/z 408-423  
Experiment 24: m/z 422-437  
Experiment 25: m/z 436-451  
Experiment 26: m/z 450-465  
Experiment 27: m/z 454-479  
Experiment 28: m/z 478-493  
Experiment 29: m/z 492-507  
Experiment 30: m/z 506-521  
Experiment 31: m/z 520-535  
Experiment 32: m/z 534-549  
Experiment 33: m/z 548-563  
Experiment 34: m/z 562-577  
Experiment 35: m/z 576-591  
Experiment 36: m/z 590-605  
Experiment 37: m/z 604-900  
Experiment 38: m/z 899-1,250

Total cycle time

$\pm 1.0$  s

**Supplemental Table S3.** Overview of PeakView chemical identification settings.

| Setting                                                               | Value                       |
|-----------------------------------------------------------------------|-----------------------------|
| <i>Calculations:</i>                                                  |                             |
| Do not calculate details for XIC with intensity < N counts or S:N < M | N = 1000, M = 100           |
| Default XIC width (Da)                                                | 0.01                        |
| Default retention time width                                          | 0.2                         |
| Default threshold (cps)                                               | 100                         |
| Default threshold (ratio of control)                                  | 1                           |
| Non-targeted peak finding                                             | Not selected                |
| Formula Finder                                                        | Not selected                |
| <i>Library searching:</i>                                             |                             |
| Algorithm to use during library search                                | Candidate search            |
| Results sorted by                                                     | Fit                         |
| Libraries to search                                                   | Sciex Forensics version 1.1 |
|                                                                       | Custom spectral library     |
| Precursor mass tolerance                                              | 0.4 Da                      |
| Collision energy tolerance                                            | Not selected                |
| Retention time tolerance                                              | Not selected                |
| Mass tolerance                                                        | 0.4 Da                      |
| Use polarity                                                          | Selected                    |
| Use collision energy spread                                           | Not selected                |
| Use compound specific purity                                          | Not selected                |
| Maximum number of hits                                                | 5                           |
| Intensity threshold                                                   | 0.05                        |
| Minimal purity                                                        | 10%                         |
| Intensity factor                                                      | 5                           |
| <i>Confidence settings:</i>                                           |                             |
| Mass error – hit                                                      | < 5 ppm                     |
| Mass error – potential hit                                            | < 10 ppm                    |
| Mass error – contribution to combined score                           | 40%                         |
| Isotope ratio – hit                                                   | < 10%                       |
| Isotope ratio – potential hit                                         | < 20%                       |
| Isotope ratio – contribution to combined score                        | 10%                         |
| Library score – hit                                                   | > 70                        |
| Library score – potential hit                                         | > 30                        |
| Library score – contribution to combined score                        | 50%                         |
| Combined score for a positive identification                          | ≥ 80%                       |

**Supplemental Table S4.** Overview of MarkerView data (pre)processing settings.

| Setting                                                                                      | Value                           |
|----------------------------------------------------------------------------------------------|---------------------------------|
| <i>Feature finding:</i>                                                                      |                                 |
| Experiment                                                                                   | MS1-only or all MS2 experiments |
| Minimum retention time                                                                       | 0.50 min                        |
| Maximum retention time                                                                       | 16.00 min                       |
| Subtraction offset                                                                           | 15 scans                        |
| Subtraction multiplication factor                                                            | 1.3                             |
| Noise threshold                                                                              | 5                               |
| Minimum spectral peak width                                                                  | 5 ppm                           |
| Minimum retention time peak width                                                            | 5 scans                         |
| Assign charge states                                                                         | Enabled                         |
| <i>Feature alignment:</i>                                                                    |                                 |
| Retention time tolerance                                                                     | 0.50 min                        |
| Mass tolerance                                                                               | 0.01 Da                         |
| <i>Feature filtering:</i>                                                                    |                                 |
| Maximum number of peaks                                                                      | 8,000,000*                      |
| Remove peaks in < N samples                                                                  | Disabled                        |
| Isotope filtering                                                                            | Disabled                        |
| Intensity threshold                                                                          | 5                               |
| Use exclusion list                                                                           | Disabled                        |
| Retention time filtering                                                                     | Disabled                        |
| Use area integrated from raw data, not from original peak finding                            | Disabled                        |
| <i>MS1-level normalization**:</i>                                                            |                                 |
| Normalization method                                                                         | Most-Likely Ratio               |
| <i>MS2-level normalization**:</i>                                                            |                                 |
| Normalization feature m/z value (diclofenac- <sup>13</sup> C <sub>6</sub> fragment ion)      | 256.04                          |
| Normalization feature experiment (diclofenac- <sup>13</sup> C <sub>6</sub> fragment ion)     | 16                              |
| Normalization feature retention time (diclofenac- <sup>13</sup> C <sub>6</sub> fragment ion) | 13 min                          |
| <i>Principle component analysis:</i>                                                         |                                 |
| PCA preprocessing - Weighting                                                                | None                            |
| PCA preprocessing - Scaling                                                                  | Pareto                          |
| Perform PCA-DA (supervised)                                                                  | Disabled                        |
| <i>Principle component analysis-discriminant analysis:</i>                                   |                                 |
| PCA preprocessing - Weighting                                                                | None                            |
| PCA preprocessing - Scaling                                                                  | Pareto                          |
| Perform PCA-DA (supervised)                                                                  | Enabled                         |
| <i>T-test:</i>                                                                               |                                 |
| Samples per group for “first to last” comparison                                             | Disabled                        |
| Use Welch t-test                                                                             | Disabled                        |

\*: This parameter was set high enough to prevent peaks from getting filtered at this stage.

\*\*: Normalization was performed after feature peak list generation.

**Supplemental Table S5.** Baseline characteristics of the stable liver (LKR) and kidney transplant recipients (KTR) included in this study.

| Variable*                                                                                                      | LTR          | KTR          |
|----------------------------------------------------------------------------------------------------------------|--------------|--------------|
| Samples, number                                                                                                | 316          | 570          |
| Females, %                                                                                                     | 43%          | 42%          |
| Age, years                                                                                                     | 55.0 (14.6)  | 55.4 (13.1)  |
| Body mass index (BMI), kg/m <sup>2</sup>                                                                       | 26.7 (4.9)   | 27.4 (5.0)   |
| Body length, cm                                                                                                | 172 (10)     | 173 (10)     |
| Body weight, kg                                                                                                | 79.6 (17.0)  | 81.7 (16.6)  |
| Waist circumference, cm                                                                                        | 97.2 (15.8)  | 99.6 (14.2)  |
| Hip circumference, cm                                                                                          | 102.3 (10.4) | 102.4 (10.3) |
| Serum albumin, g/L                                                                                             | 44.0 (3.4)   | 43.3 (2.9)   |
| Estimated glomerular filtration rate (eGFR), mL/min/1.73m <sup>2</sup>                                         | 74.9 (26.2)  | 53.1 (19.2)  |
| <b>Abbreviations:</b> BMI, body mass index; LTR, liver transplant recipient; KTR, kidney transplant recipient. |              |              |
| *: continuous variables are presented as mean (standard deviation).                                            |              |              |

**Supplemental Table S6.** Quantitative data for cocaine and selected cocaine metabolites in the urine of samples in which benzoylecgonine was identified.

| Sample | Cocaine    | Benzoylecgonine | Ecgonine methyl ester | Cocaethylene |
|--------|------------|-----------------|-----------------------|--------------|
| X-1    | <25 ng/mL  | <25 ng/mL       | <25 ng/mL             | <25 ng/mL    |
| X-2    | <25 ng/mL  | <25 ng/mL       | <25 ng/mL             | <25 ng/mL    |
| X-3    | <25 ng/mL  | <25 ng/mL       | <25 ng/mL             | <25 ng/mL    |
| X-4    | <25 ng/mL  | <25 ng/mL       | <25 ng/mL             | <25 ng/mL    |
| X-5    | <25 ng/mL  | 1251 ng/mL      | 229 ng/mL             | <25 ng/mL    |
| Y-1    | <25 ng/mL  | 1524 ng/mL      | 200 ng/mL             | <25 ng/mL    |
| Y-2    | 1167 ng/mL | 137 ng/mL       | 6332 ng/mL            | <25 ng/mL    |

**Supplemental Table S7.** P-value matrix for differences in MS1-level ratios of possible phase I metabolites of omeprazole when comparing omeprazole and esomeprazole users among liver transplant recipients (in grey) and kidney transplant recipients (in black). With regard to drug use, only “double-positive” subjects were included, and subjects were assigned as omeprazole or esomeprazole user based on information present in the clinical database.

| m/z | 268  |      | 310  |      | 316   |      | 330 |       | 332   |       | 360 |      | 362   |       |       | 376 |       |      | 378   |       |       | 392   |  |
|-----|------|------|------|------|-------|------|-----|-------|-------|-------|-----|------|-------|-------|-------|-----|-------|------|-------|-------|-------|-------|--|
|     | RT   | 5.6  | 6.7  | 7.9  | 8.8   | 9.8  | 6.7 | 7.9   | 8.3   | 9.2   | 8.7 | 9.3  | 10.3  | 6.3   | 7.2   | 8.2 | 7.7   | 8.4  | 9.0   | 9.2   | 9.5   | 8.5   |  |
| 268 | 5.6  |      | ns   | ns*  | ns*   | ns*  | ns  | ns*   | 2e-8  | 2e-5  | ns  | ns*  | 1e-5  | ns    | 2e-5  | ns  | 6e-8  | ns*  | 9e-6  | 3e-6  | 2e-5  | 2e-4  |  |
| 310 | 6.7  | ns   |      | ns   | ns*   | ns   | ns  | 6e-5  | 8e-12 | 2e-4  | ns  | ns*  | 6e-6  | ns    | 1e-7  | ns* | 6e-8  | ns*  | 2e-4  | 4e-5  | ns*   | ns*   |  |
| 316 | 7.9  | ns   | ns   |      | ns    | ns   | ns  | 5e-5  | 4e-10 | ns    | ns* | ns   | ns    | ns    | 2e-6  | ns* | 1e-8  | ns*  | ns    | ns*   | ns    | ns    |  |
|     | 8.8  | ns   | ns*  | ns   |       | ns   | ns  | 1e-11 | 4e-17 | ns    | ns* | ns   | ns    | ns*   | 8e-12 | ns* | 5e-11 | 1e-6 | ns*   | ns*   | ns    | ns    |  |
| 330 | 9.8  | ns   | ns   | ns   | ns    |      | ns  | ns*   | 4e-8  | ns*   | ns  | ns   | ns*   | ns    | 3e-6  | ns* | 5e-8  | ns*  | ns    | 2e-4  | ns*   | ns    |  |
| 332 | 6.7  | ns   | ns   | ns   | ns    | ns   |     | ns*   | 3e-6  | ns    | ns  | ns   | ns    | ns    | ns*   | ns  | 8e-5  | ns   | ns    | ns*   | ns    | ns    |  |
|     | 7.9  | ns*  | ns*  | 2e-4 | 4e-10 | ns*  | ns* |       | 2e-6  | 7e-8  | ns  | 1e-4 | 1e-7  | 6e-5  | ns*   | ns  | 4e-5  | ns   | 6e-10 | 7e-7  | 2e-6  | 2e-8  |  |
| 360 | 8.3  | 2e-4 | 1e-5 | 2e-7 | 5e-12 | 2e-4 | ns* | ns*   |       | 2e-13 | ns  | 2e-8 | 1e-11 | 3e-13 | ns*   | ns  | ns    | 3e-7 | 1e-13 | 1e-9  | 6e-10 | 2e-18 |  |
|     | 9.2  | ns*  | ns*  | ns   | ns    | ns   | ns  | 5e-5  | 5e-7  |       | ns* | ns   | ns    | 2e-4  | 2e-12 | ns* | 1e-12 | 1e-8 | ns    | ns*   | ns    | ns    |  |
| 362 | 8.7  | ns   | ns   | ns   | ns    | ns   | ns  | ns    | ns    | ns*   |     | ns*  | ns*   | ns    | ns    | ns  | ns*   | ns   | ns*   | ns*   | ns*   | ns*   |  |
|     | 9.3  | ns   | ns   | ns   | ns    | ns   | ns  | ns*   | 1e-4  | ns    | ns  |      | ns    | ns*   | 1e-6  | ns* | 7e-10 | 5e-5 | ns    | ns*   | 6e-5  | ns    |  |
|     | 10.3 | ns*  | 7e-6 | ns   | ns    | ns*  | ns  | 7e-6  | 8e-8  | ns    | ns* | ns   |       | ns*   | 2e-10 | ns* | 1e-11 | 1e-7 | ns    | ns*   | ns    | ns    |  |
| 376 | 6.3  | ns   | ns   | ns   | ns*   | ns   | ns  | ns*   | 2e-6  | ns*   | ns  | ns   | ns*   |       | 5e-9  | ns  | 2e-8  | ns*  | ns*   | ns*   | ns*   | 9e-5  |  |
|     | 7.2  | ns*  | ns*  | ns*  | 8e-6  | ns*  | ns* | ns    | ns    | 3e-7  | ns  | ns*  | 1e-6  | ns*   |       | ns  | ns*   | ns*  | 4e-11 | 1e-8  | 2e-8  | 9e-16 |  |
|     | 8.2  | ns   | ns   | ns   | ns    | ns   | ns  | ns    | ns    | ns*   | ns  | ns   | ns*   | ns    | ns    |     | ns    | ns   | ns*   | 2e-4  | ns*   | ns*   |  |
| 378 | 7.7  | 2e-4 | 2e-4 | 5e-6 | 2e-6  | 1e-4 | ns* | ns*   | ns    | 3e-7  | ns* | 1e-5 | 9e-8  | 1e-4  | ns*   | ns  |       | 2e-6 | 2e-13 | 4e-12 | 3e-11 | 1e-11 |  |
|     | 8.4  | ns*  | ns   | ns*  | 2e-4  | ns*  | ns  | ns    | ns*   | 4e-5  | ns  | ns*  | 5e-6  | ns    | ns    | ns  | ns*   |      | 1e-8  | 9e-7  | 1e-6  | 3e-13 |  |
|     | 9.0  | ns   | ns   | ns   | ns    | ns   | ns  | 2e-4  | 3e-6  | ns*   | ns  | ns   | ns*   | ns    | ns*   | ns  | 7e-6  | ns*  |       | ns*   | ns    | ns    |  |
|     | 9.2  | ns*  | ns*  | ns   | ns    | ns   | ns  | ns*   | ns*   | ns    | ns  | ns   | ns    | ns    | ns*   | ns  | 3e-5  | ns*  | ns    |       | ns    | ns*   |  |
|     | 9.5  | ns   | ns*  | ns   | ns    | ns   | ns  | ns*   | 1e-4  | ns    | ns  | ns   | ns    | ns    | ns*   | ns  | 3e-5  | ns*  | ns    | ns    |       | ns    |  |
| 392 | 8.5  | ns   | ns*  | ns   | ns    | ns   | ns  | 1e-5  | 6e-8  | ns*   | ns  | ns   | ns    | ns    | 8e-6  | ns  | 6e-6  | 2e-6 | ns    | ns    | ns    |       |  |

ns: nonsignificant, as was based on Mann-Whitney U nonparametric testing using an alpha of 0.05 and Bonferroni correction. Nonsignificant associations with a P-value between the non-corrected and the Bonferroni-corrected alpha level are indicated with an asterisk (\*).



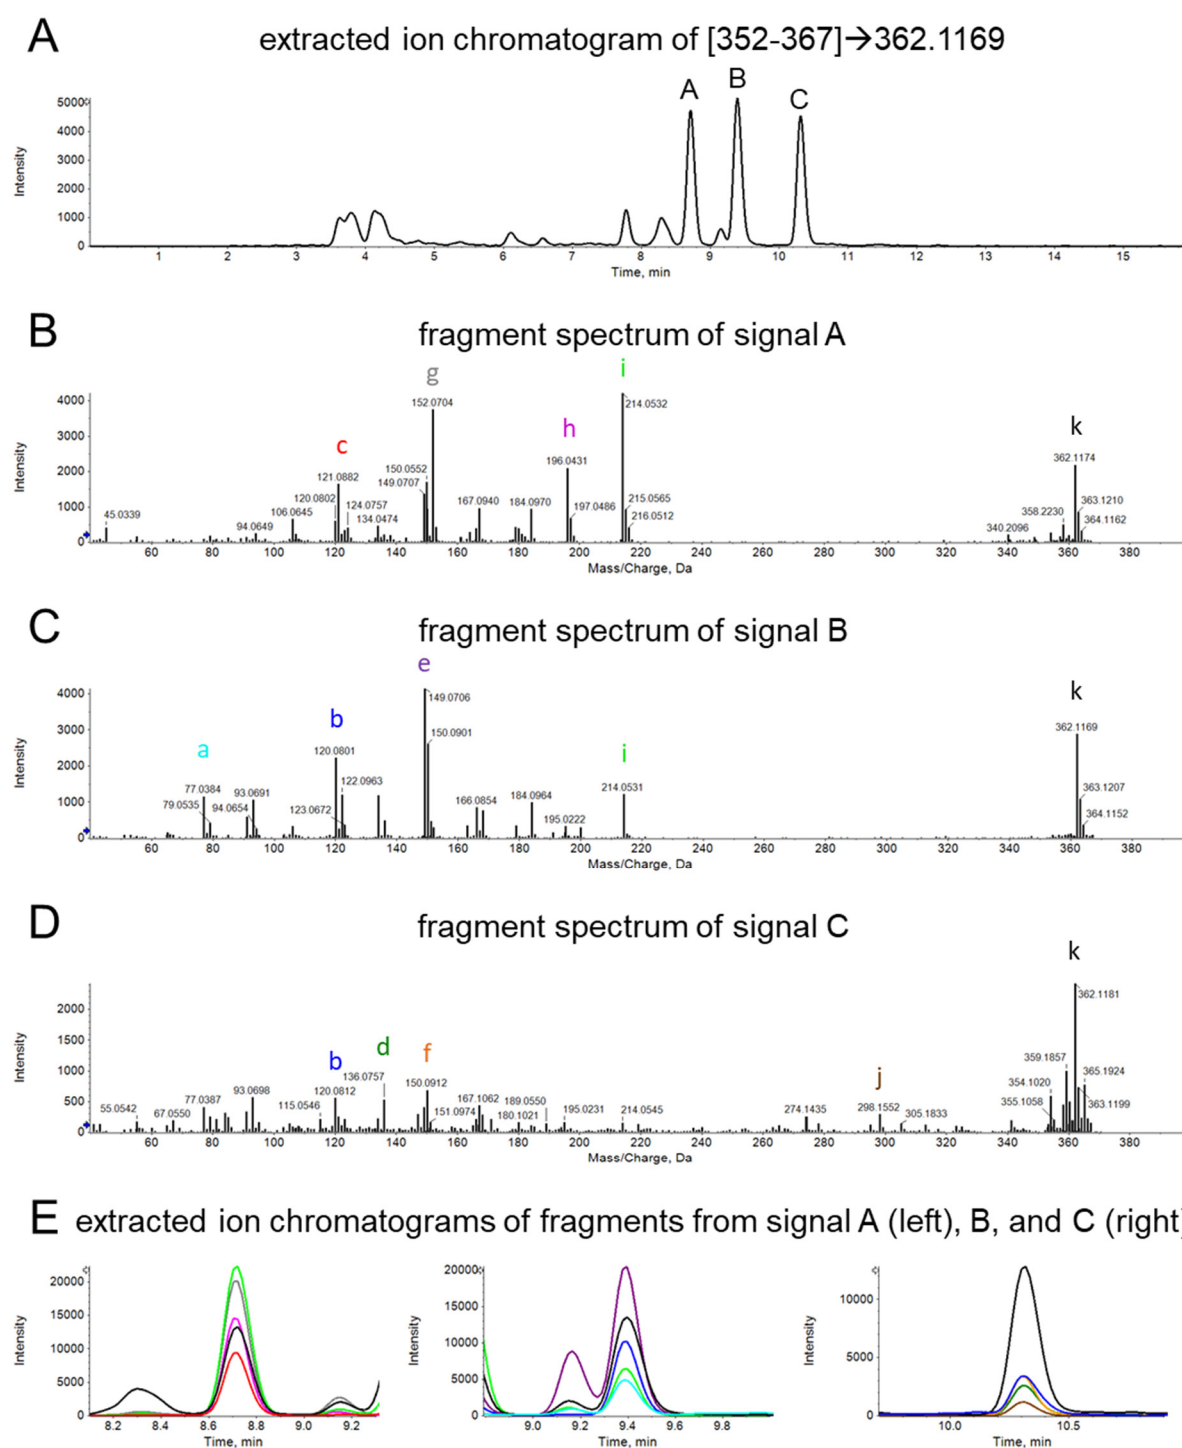

**Supplemental Figure S1.** Exemplary (A, E) extracted ion chromatograms and (B, C, D) fragment spectra of three possible oxidation products (+16) of omeprazole as observed in one of the omeprazole-positive samples. Quantifier traces for signals A, B, and C are respectively indicated in light green ( $m/z$  214.0532, i), light green ( $m/z$  214.0532, i), and brown ( $m/z$  298.1550, j). The blue and white arrows on the y-axes indicate thresholds for presenting  $m/z$  values.

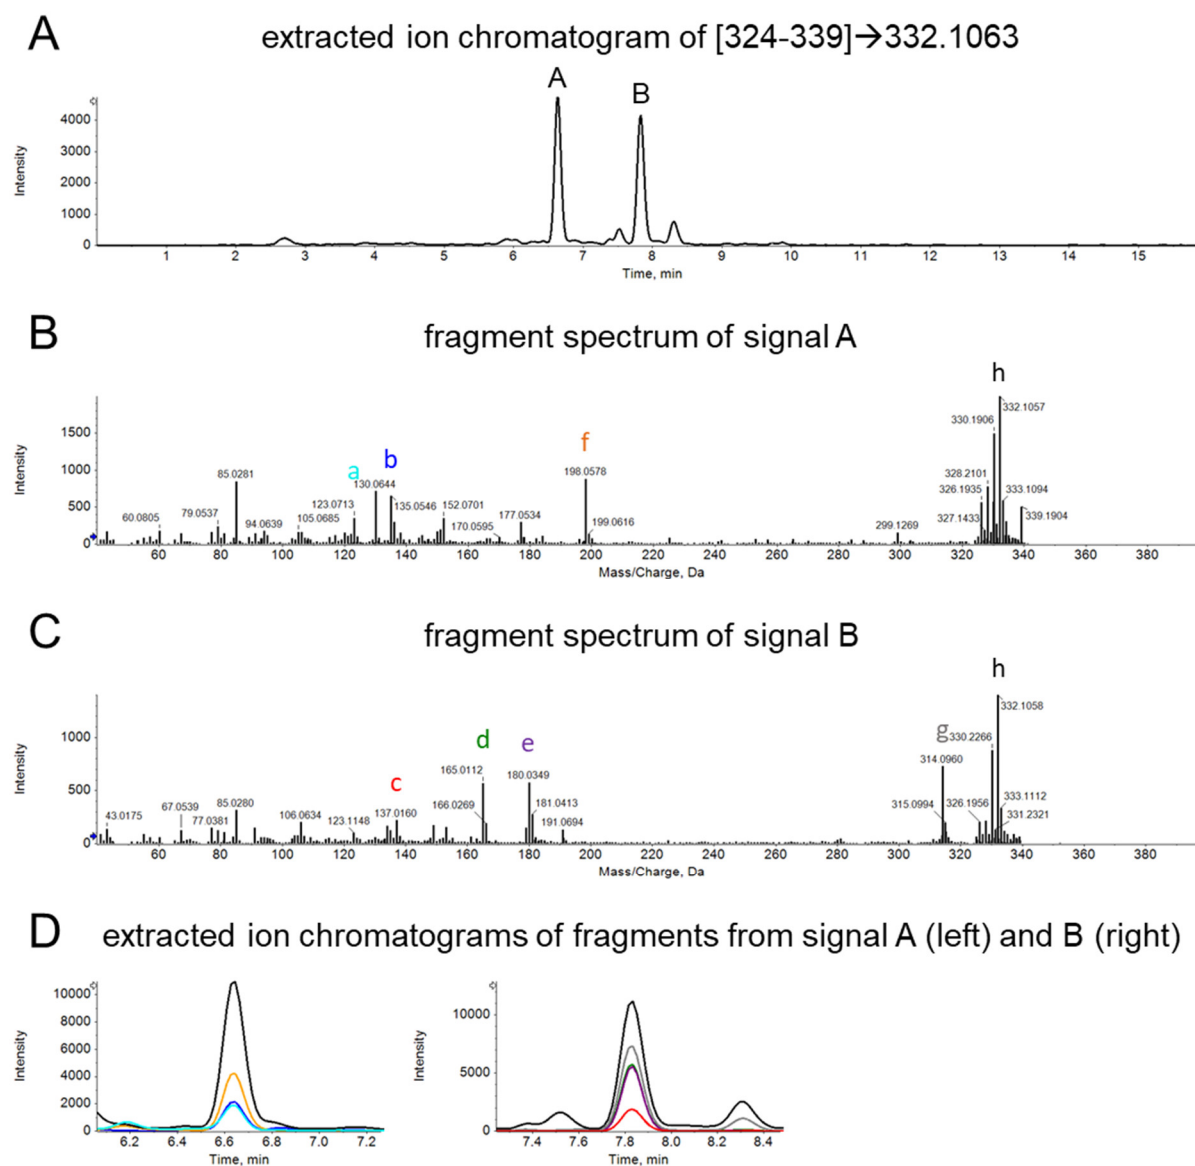

**Supplemental Figure S2.** Exemplary (A, D) extracted ion chromatograms and (B, C) fragment spectra of two possible oxidation products (-14) of omeprazole as observed in one of the omeprazole-positive samples. Quantifier traces for signals A and B are respectively indicated in orange (m/z 198.0583, f) and dark green (m/z 165.0117, d). The blue and white arrows on the y-axes indicate thresholds for presenting m/z values.

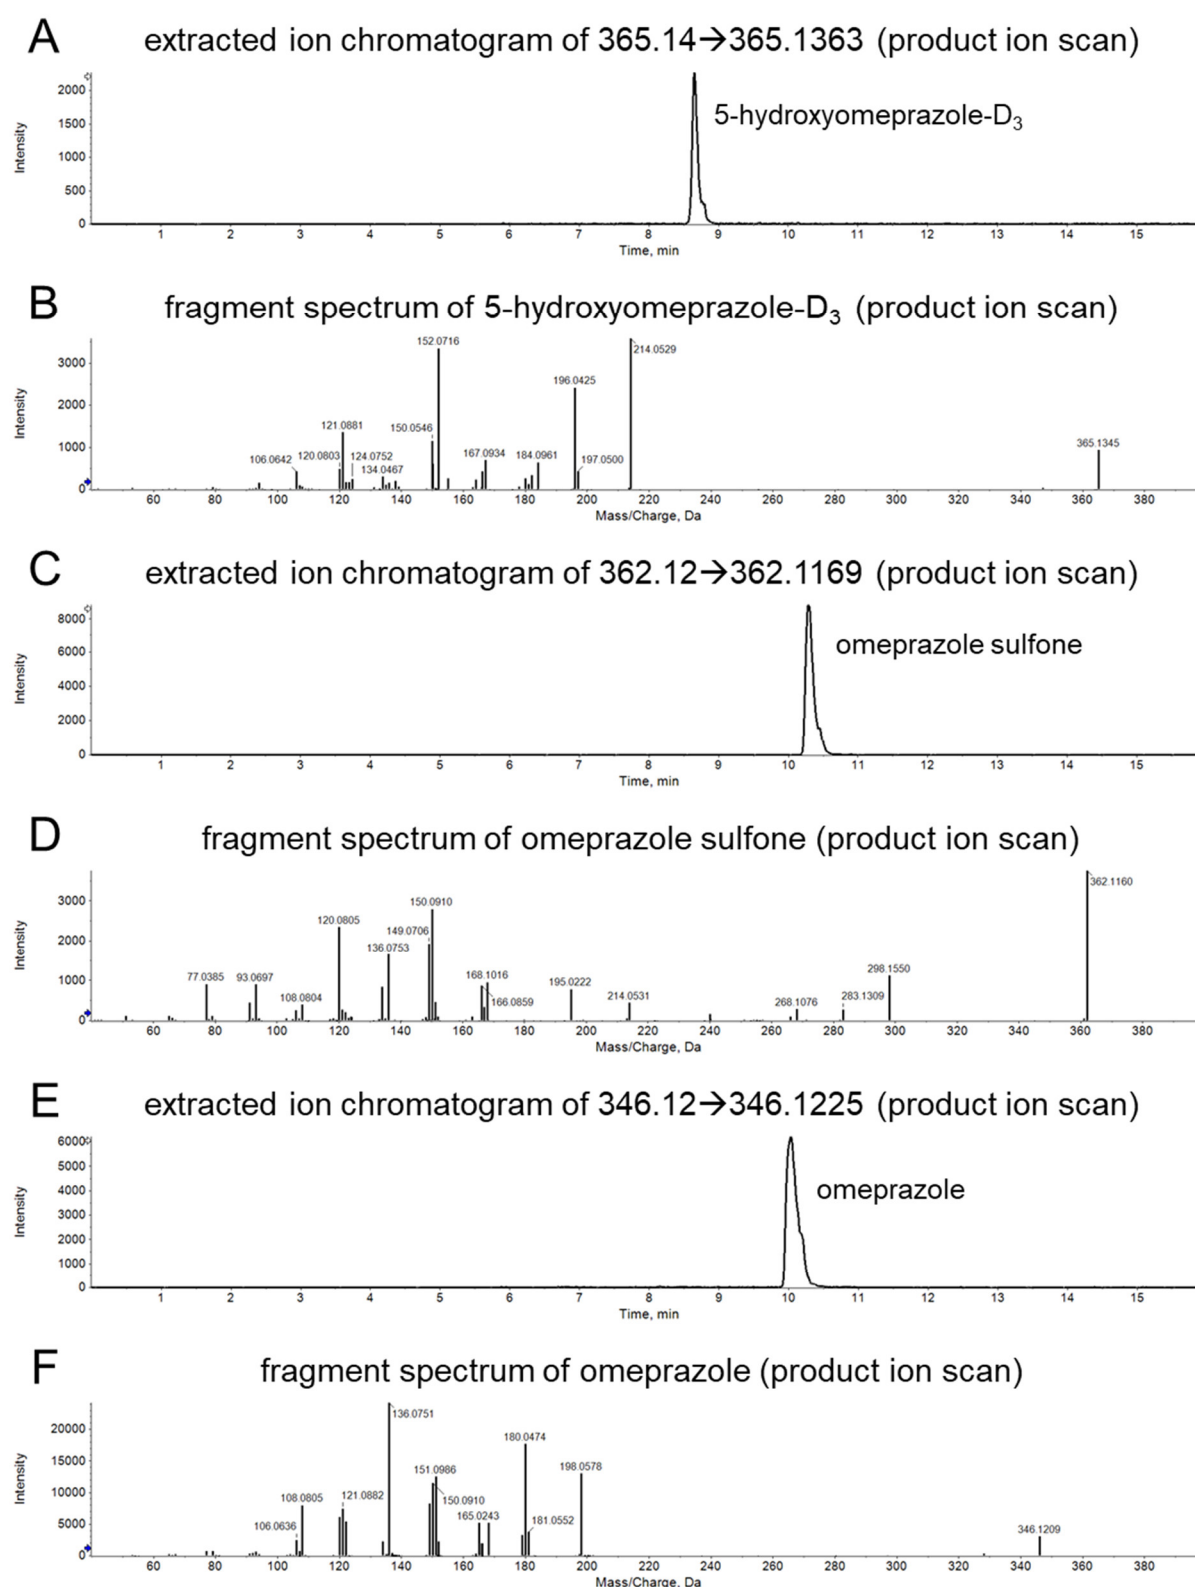

**Supplemental Figure S3.** (A, C, E) Extracted ion chromatograms and (B, D, F) fragment spectra of (A, B) 5-hydroxyomeprazole-D<sub>3</sub> (Toronto Research Chemicals, Cat. No. H948864), (C, D) omeprazole sulfone (Sigma-Aldrich, Cat. No. O0151000), and (E, F) omeprazole (crushed granules from a omeprazole capsule from the company Healthypharm). The blue and white arrows on the y-axes indicate thresholds for presenting m/z values.

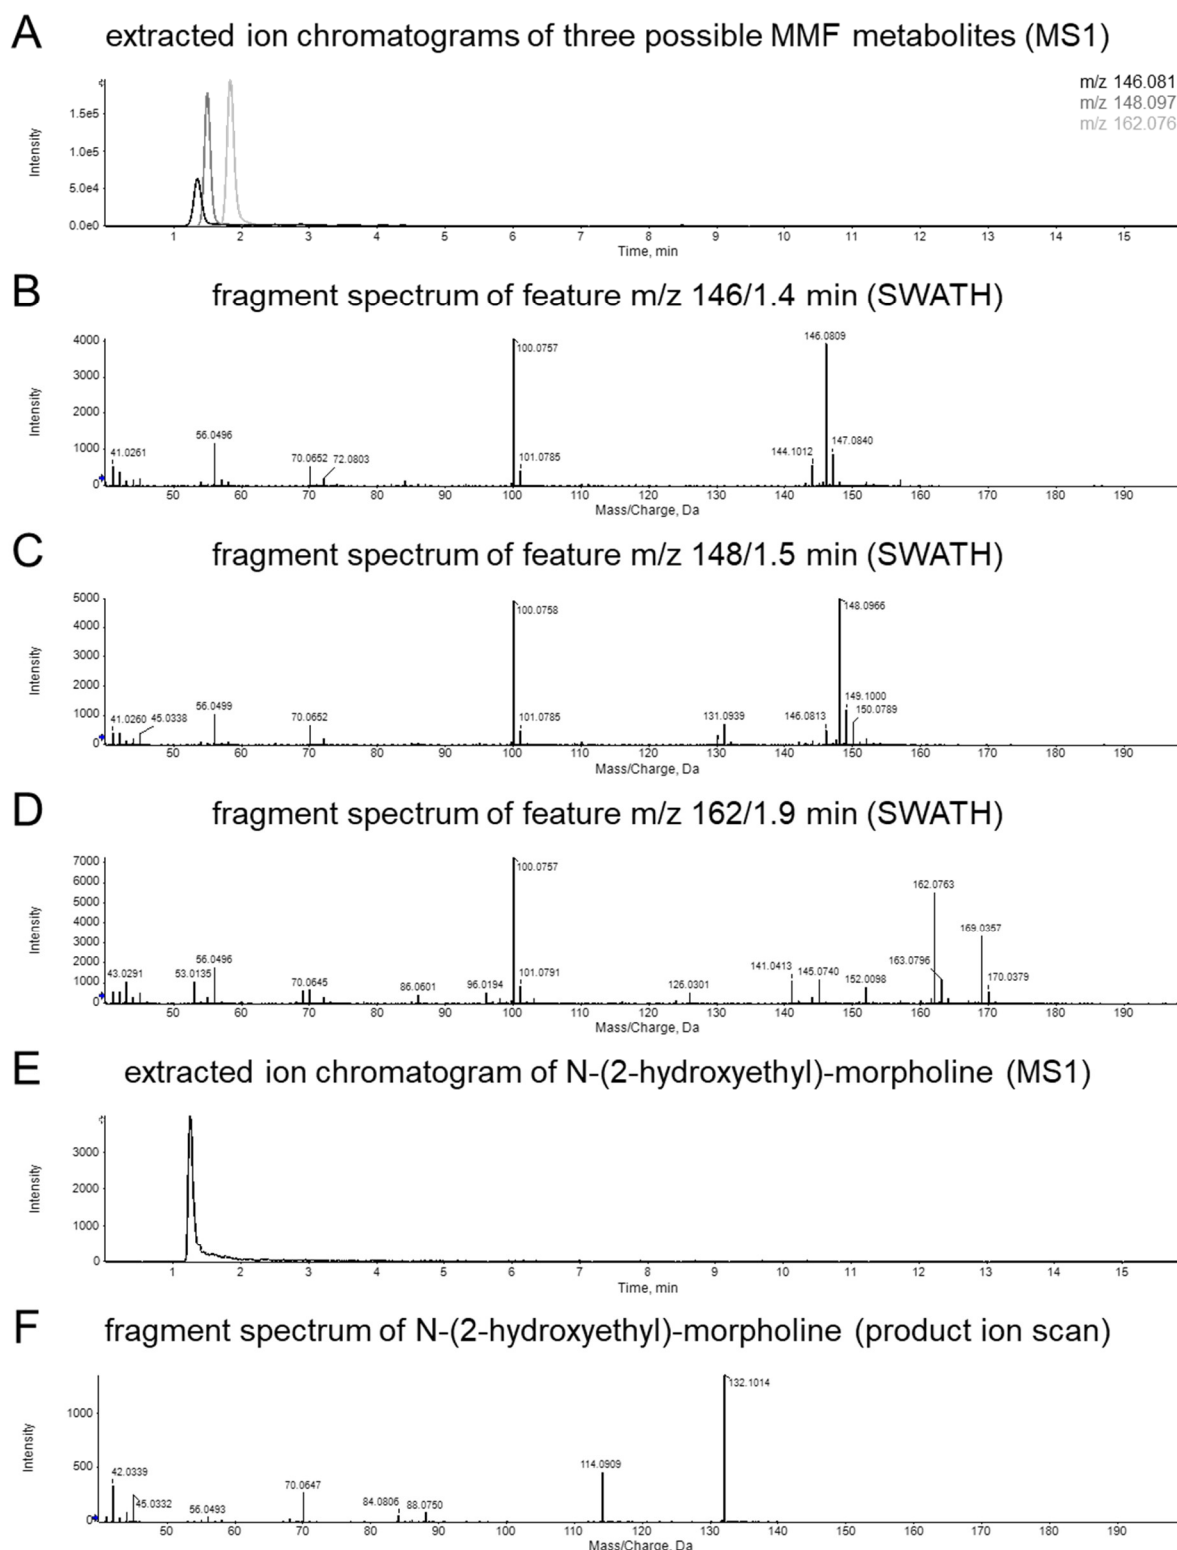

**Supplemental Figure S4.** Exemplary (A) extracted ion chromatograms and (B, C, D) fragment spectra of three possible biotransformation products of MMF's mofetil moiety. (E) Extracted ion chromatogram and (F) fragment spectrum of N-(2-hydroxyethyl)-morpholine (Sigma-Aldrich, Cat. No. H28203), which was not detected but has been described as possible biotransformation product of MMF's mofetil moiety. The blue and white arrows on the y-axes indicate thresholds for presenting m/z values.

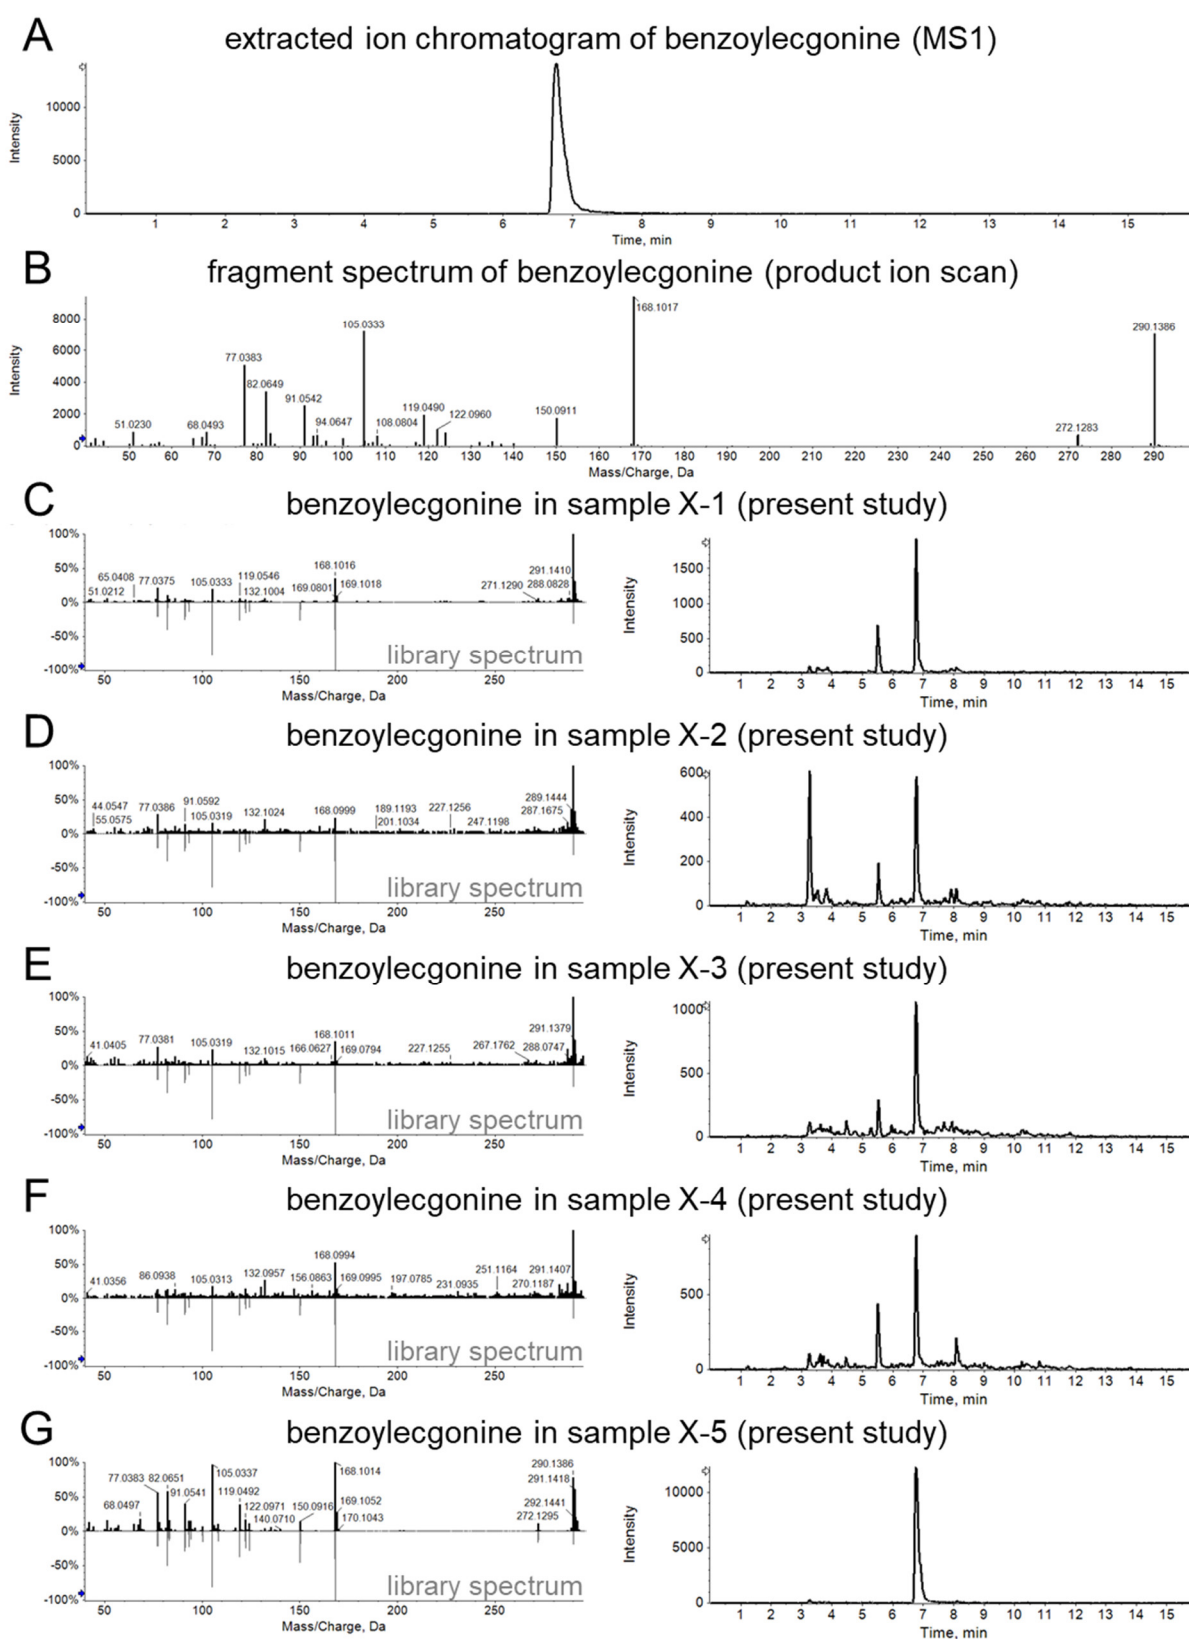

**Supplemental Figure S5.** (A) Extracted ion chromatogram and (B) fragment spectrum of benzoylecgonine (Lipomed, Cat. No. COC-204-FB) and (C–I) spectral library matching results of benzoylecgonine-positive samples. The blue and white arrows on the y-axes indicate thresholds for presenting  $m/z$  values.

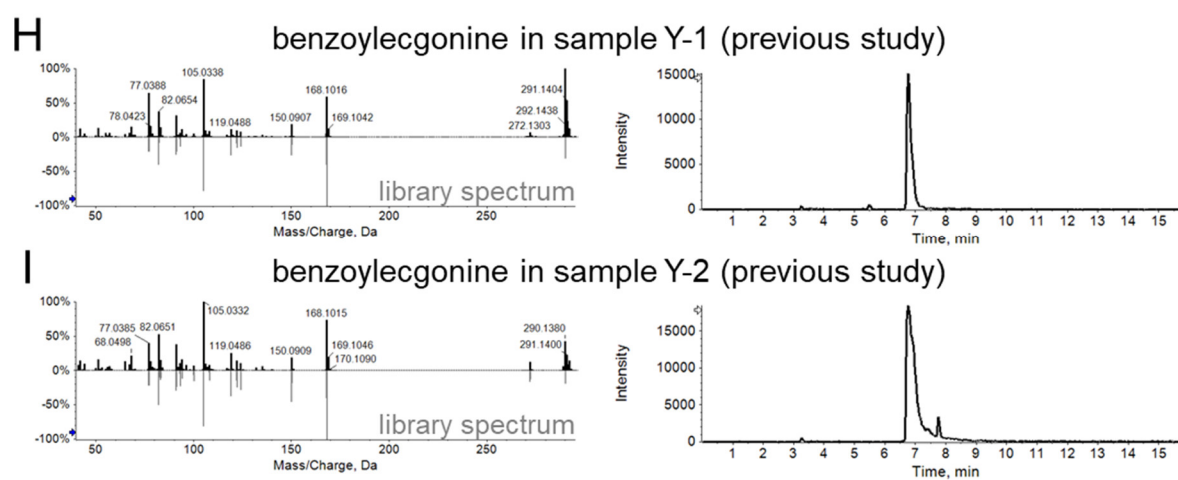Supplemental Figure S5. *Cont.*

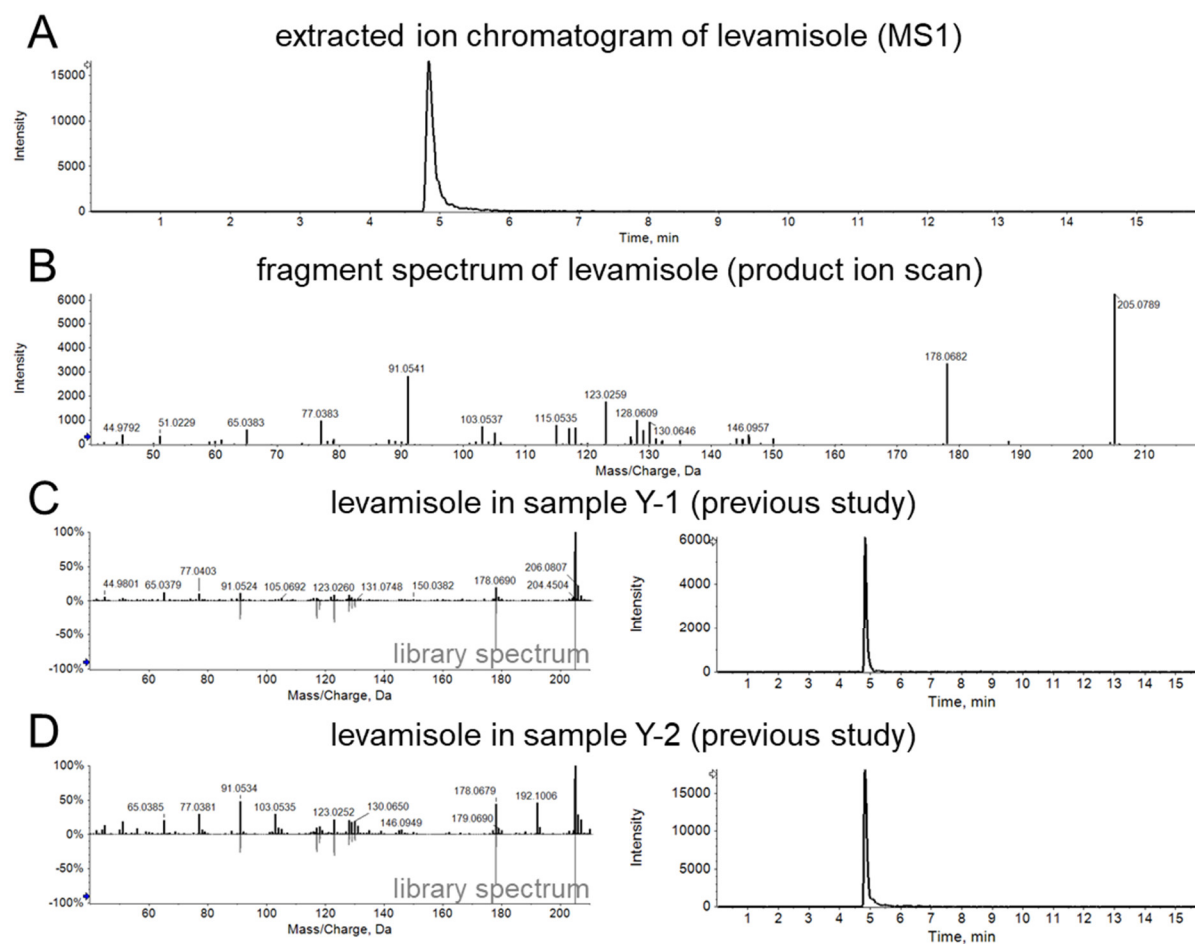

**Supplemental Figure S6.** (A) Extracted ion chromatogram and (B) fragment spectrum of levamisole (Sigma-Aldrich, Cat. No. L9756) and (C-D) spectral library matching results of levamisole-positive samples. The blue and white arrows on the y-axes indicate thresholds for presenting m/z values.



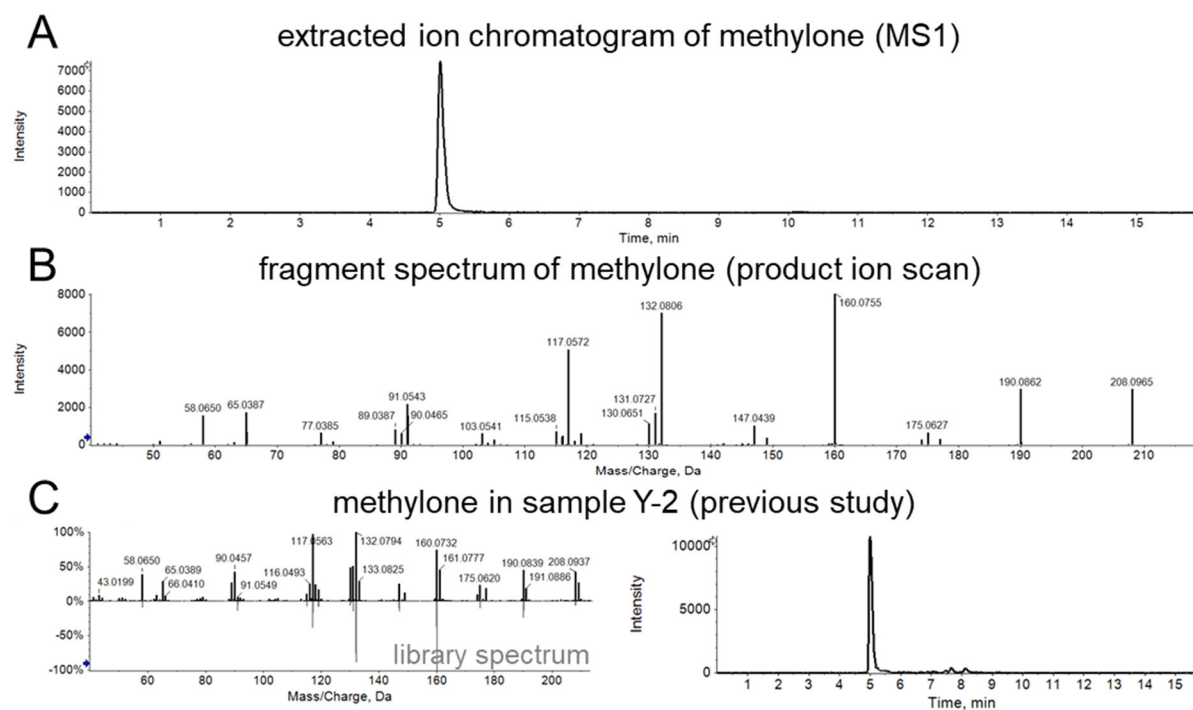

**Supplemental Figure S7.** (A) Extracted ion chromatogram and (B) fragment spectrum of methylone (Lipomed, Cat. No. MTY-1289-HC) and (C) spectral library matching result of the methylone-positive sample. The blue and white arrows on the y-axes indicate thresholds for presenting m/z values.



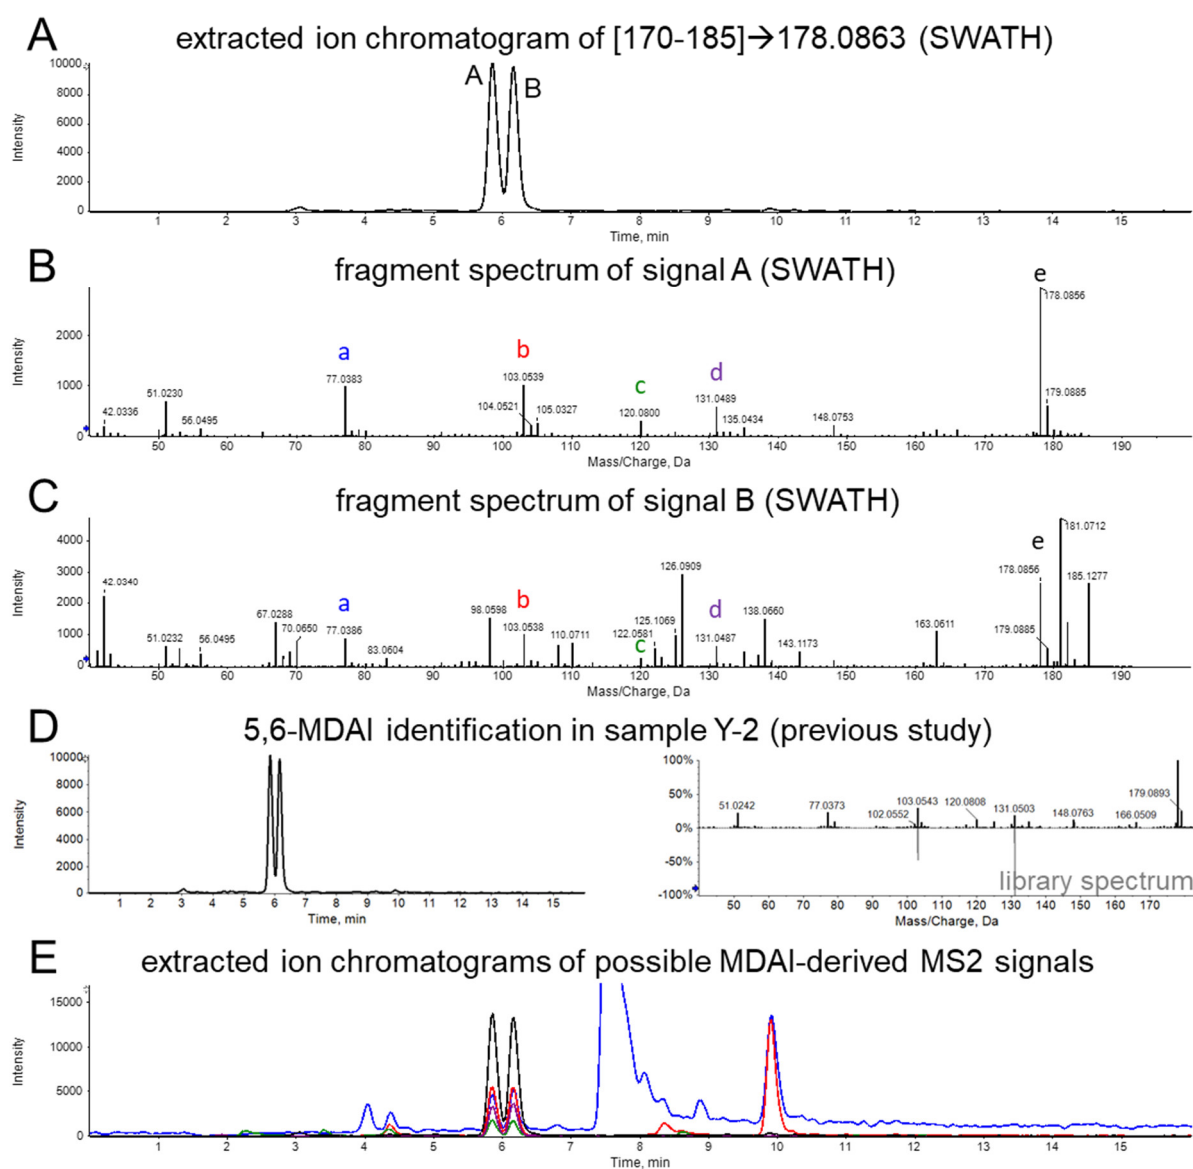

**Supplemental Figure S8.** (A) Extracted ion chromatogram and (B) fragment spectra (C) of two possible methylenedioxy-2-aminoindanes (MDAI) as well as (D) spectral library matching result for 5,6-MDAI, and (E) extracted ion chromatograms of presumed MDAI-derived fragments, as observed in the 5,6-MDAI-positive sample. The blue and white arrows on the y-axes indicate thresholds for presenting m/z values.

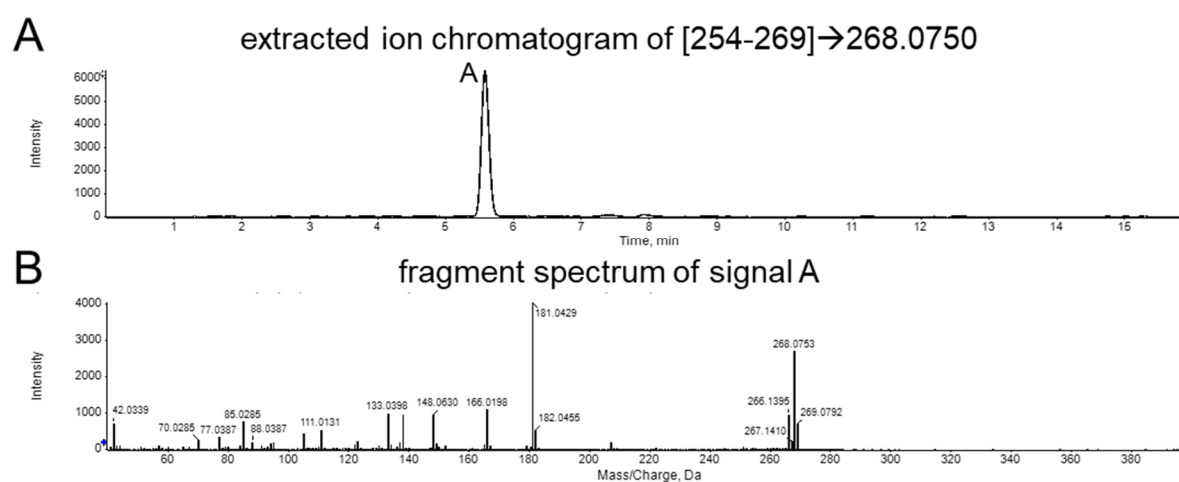

**Supplemental Figure S9.** Exemplary (A) extracted ion chromatogram and (B) fragment spectrum of a possible cysteine metabolite of omeprazole. The blue and white arrows on the y-axes indicate thresholds for presenting m/z values.

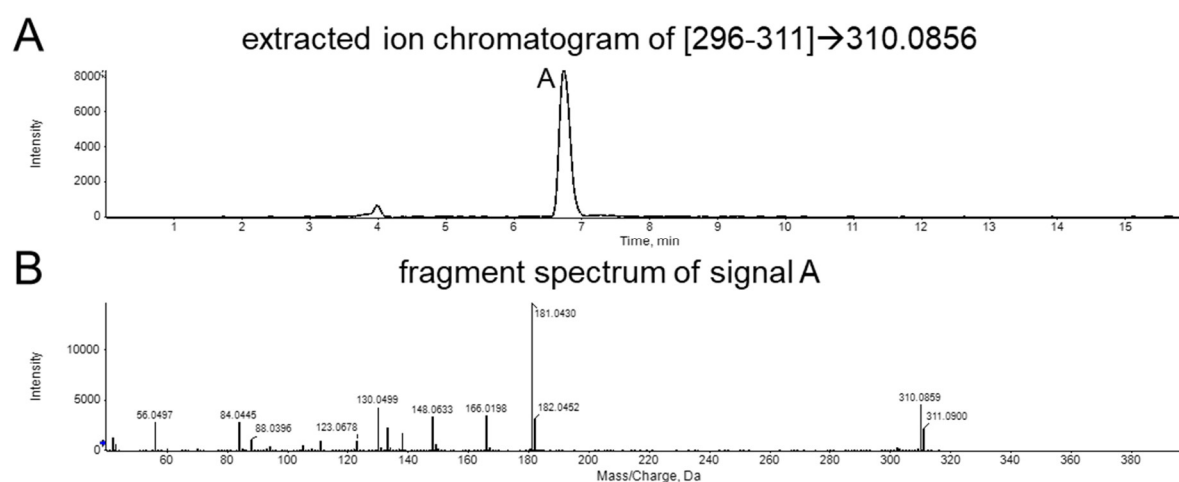

**Supplemental Figure S10.** Exemplary (A) extracted ion chromatogram and (B) fragment spectrum of a possible mercapturate metabolite of omeprazole. The blue and white arrows on the y-axes indicate thresholds for presenting m/z values.

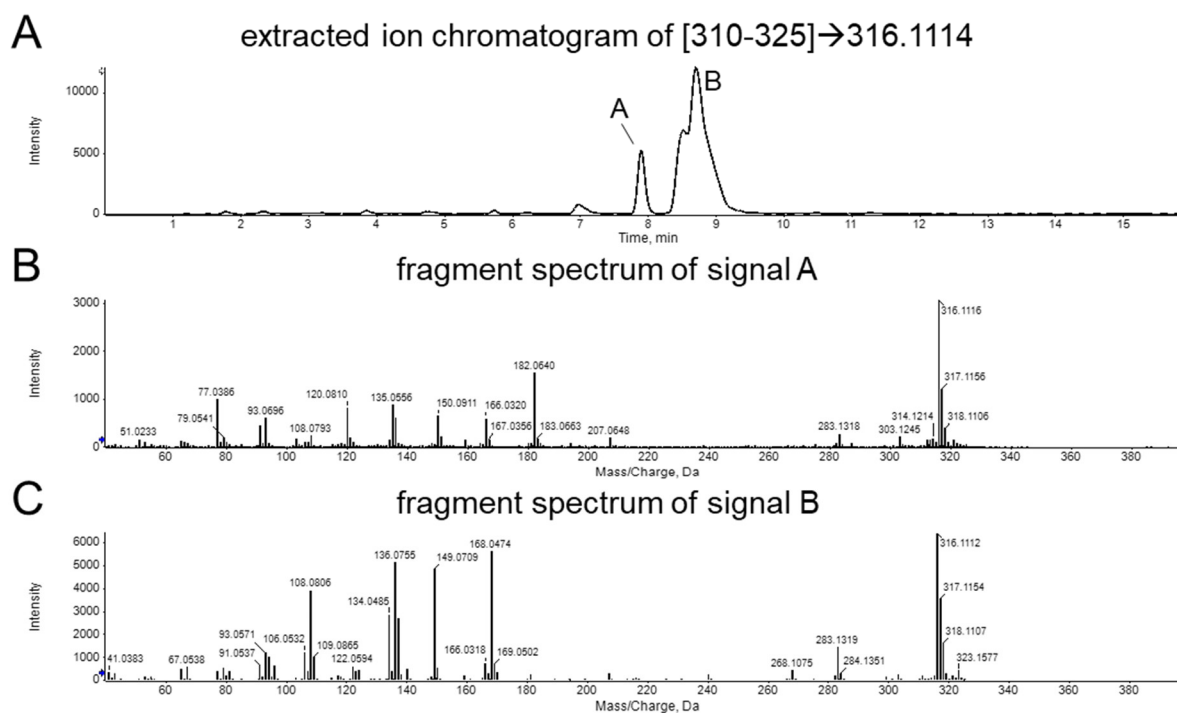

**Supplemental Figure S11.** Exemplary (A) extracted ion chromatogram and (B, C) fragment spectra of possible demethylated and dehydroxylated metabolites of omeprazole. The blue and white arrows on the y-axes indicate thresholds for presenting m/z values.

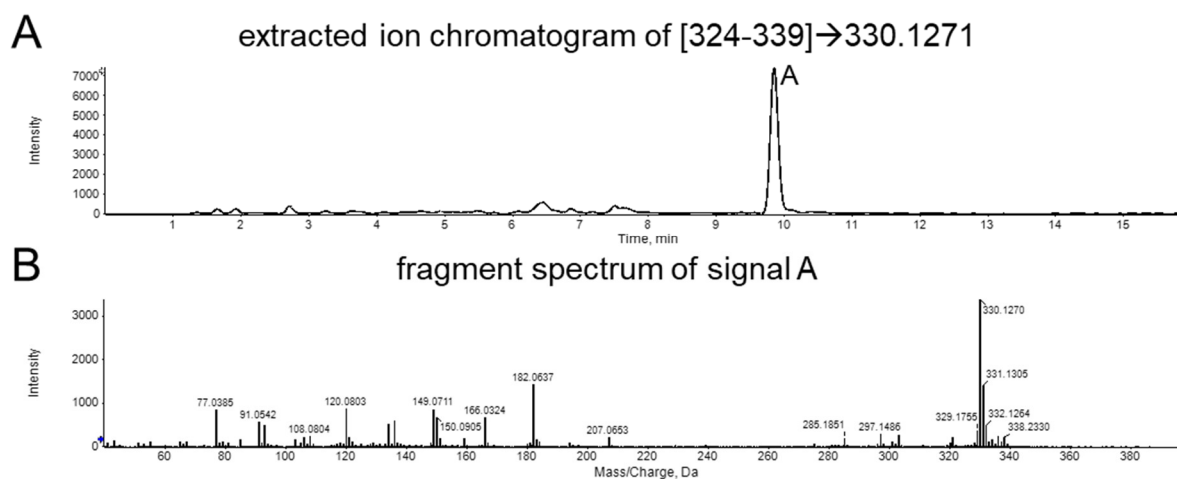

**Supplemental Figure S12.** Exemplary (A) extracted ion chromatogram and (B) fragment spectrum of a possible dehydroxylated metabolite of omeprazole. The blue and white arrows on the y-axes indicate thresholds for presenting m/z values.

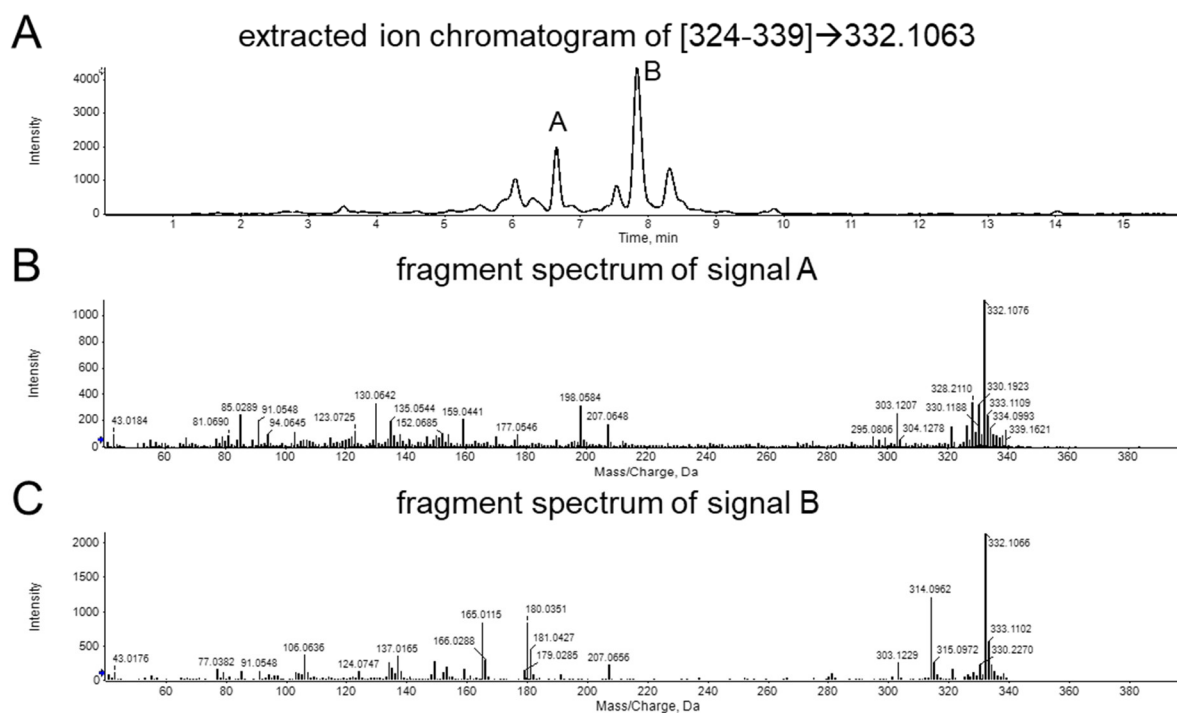

**Supplemental Figure S13.** Exemplary (A) extracted ion chromatogram and (B, C) fragment spectra of possible demethylated metabolites of omeprazole. The blue and white arrows on the y-axes indicate thresholds for presenting m/z values.

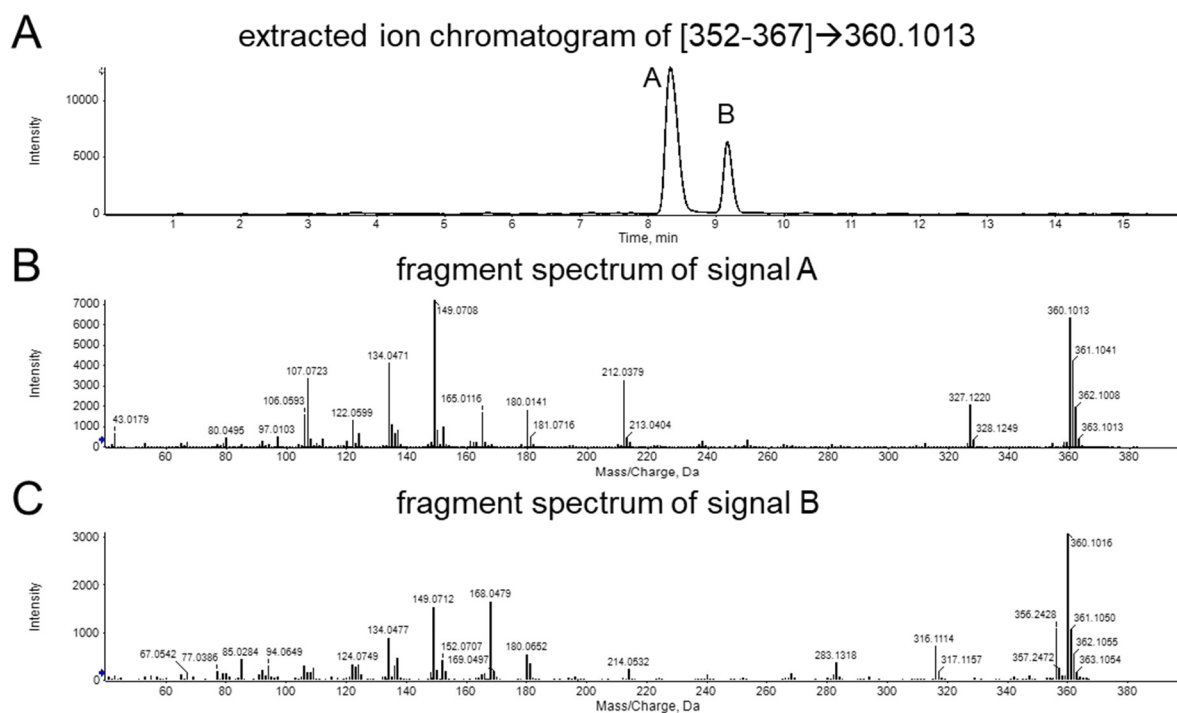

**Supplemental Figure S14.** Exemplary (A) extracted ion chromatogram and (B, C) fragment spectra of possible dehydroxylated and carboxylated metabolites of omeprazole. The blue and white arrows on the y-axes indicate thresholds for presenting m/z values.

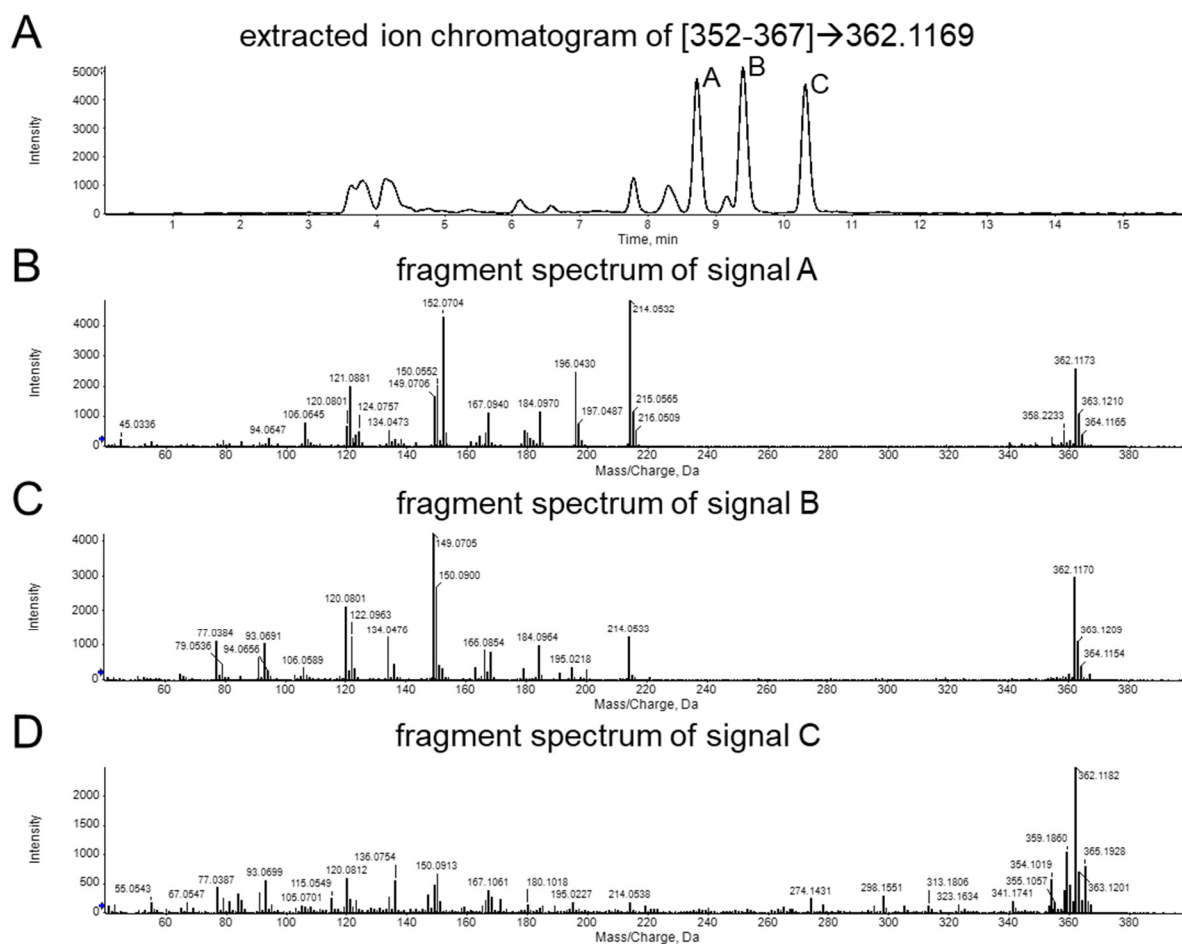

**Supplemental Figure S15.** Exemplary (A) extracted ion chromatogram and (B, C, D) fragment spectra of possible hydroxylated metabolites of omeprazole. The blue and white arrows on the y-axes indicate thresholds for presenting  $m/z$  values.



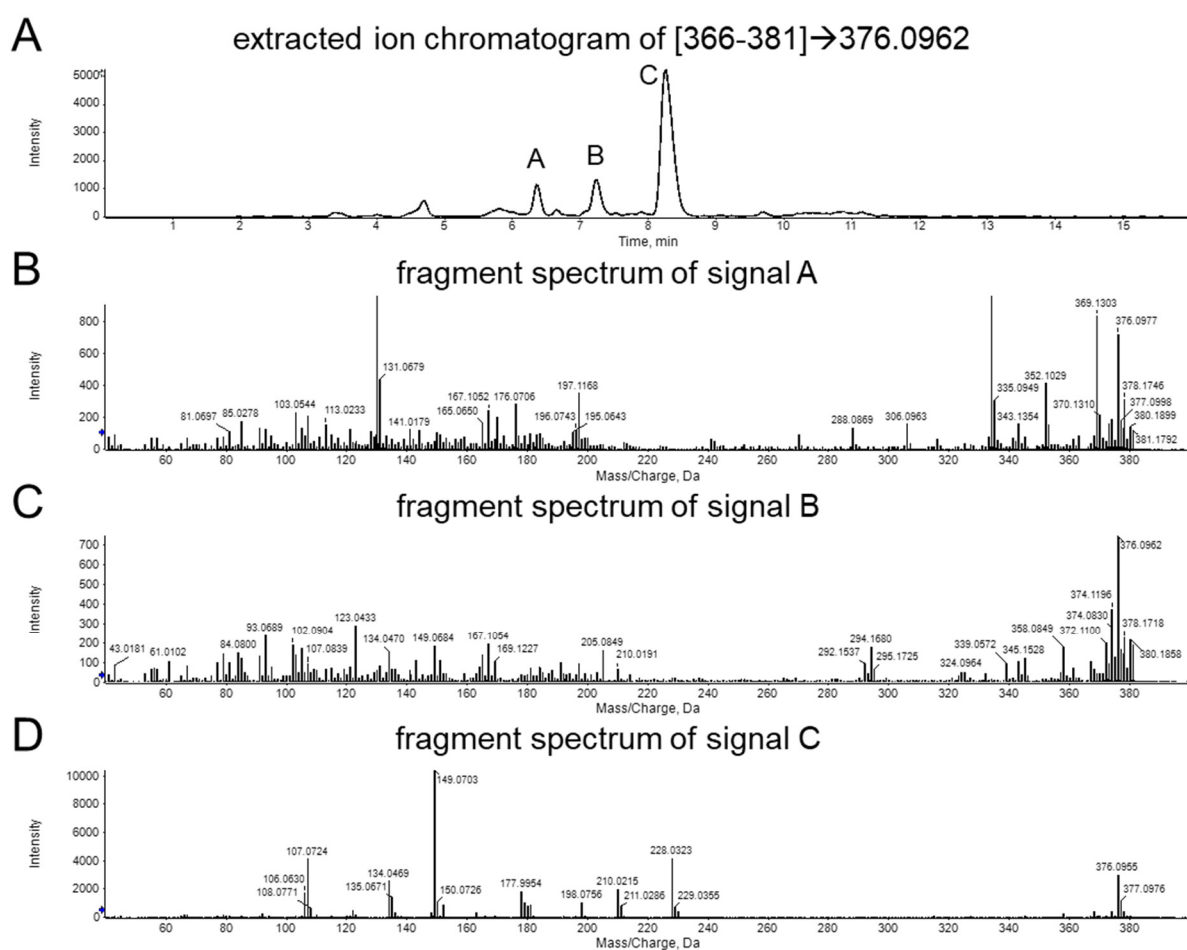

**Supplemental Figure S16.** Exemplary (A) extracted ion chromatogram and (B, C, D) fragment spectra of possible carboxylated metabolites of omeprazole. The blue and white arrows on the y-axes indicate thresholds for presenting  $m/z$  values.

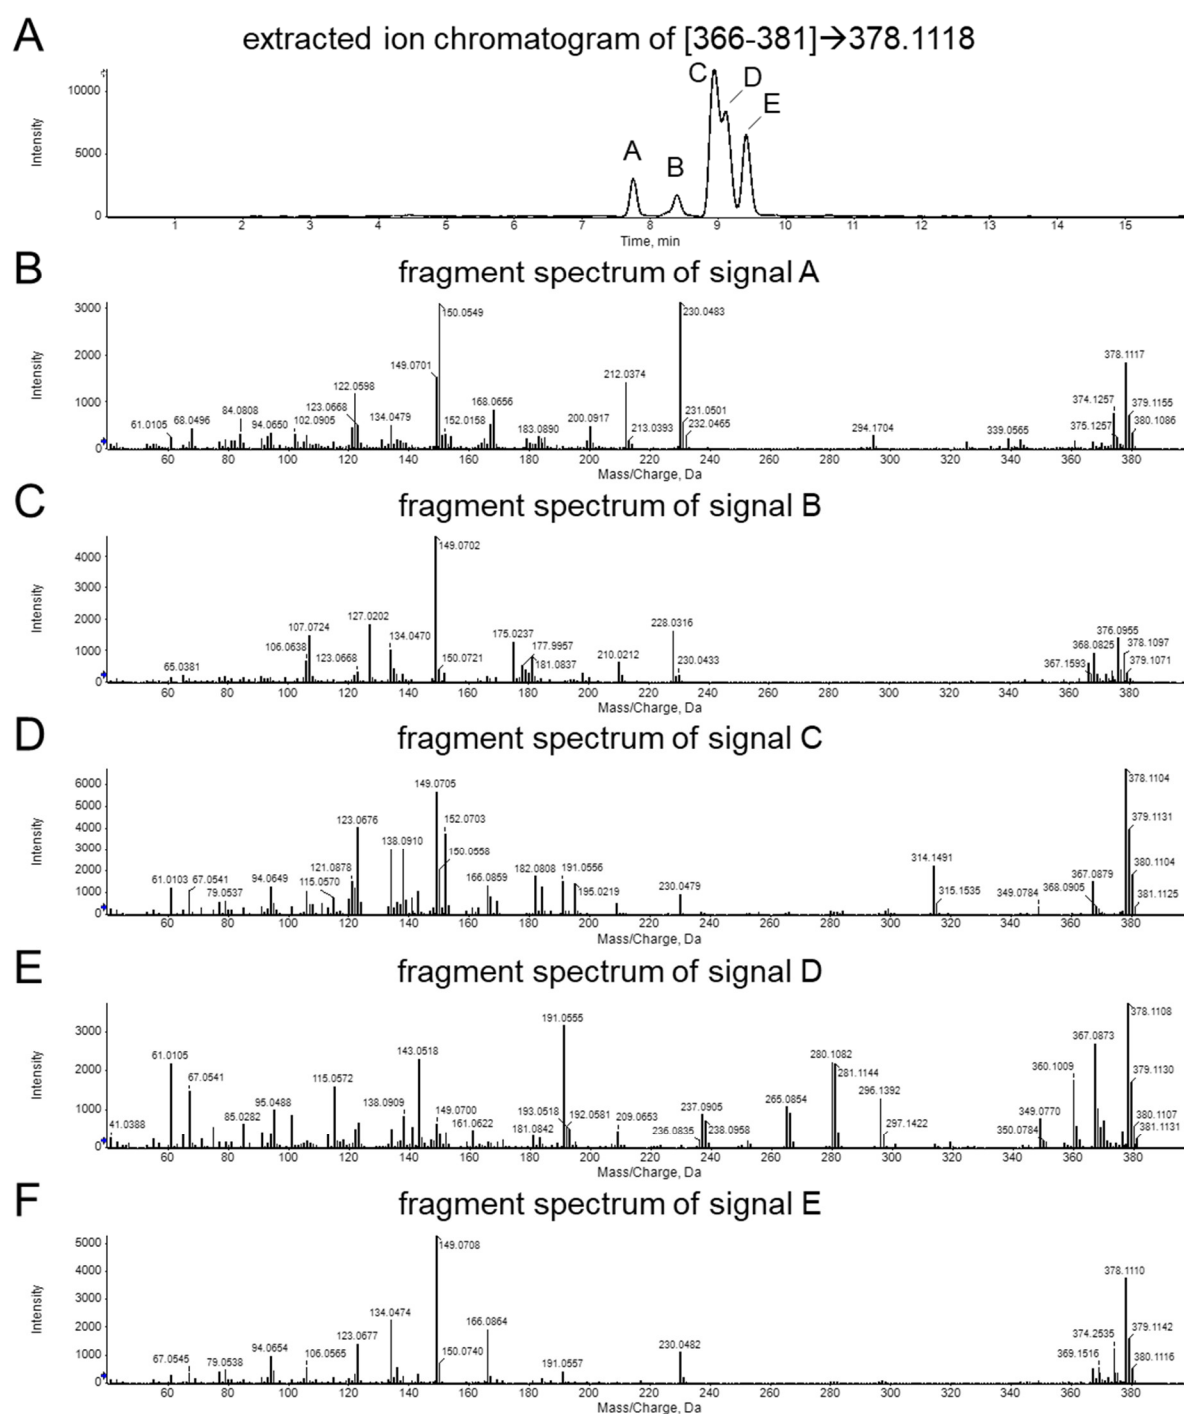

**Supplemental Figure S17.** Exemplary (A) extracted ion chromatogram and (B, C, D, E, F) fragment spectra of possible dihydroxylated metabolites of omeprazole. The blue and white arrows on the y-axes indicate thresholds for presenting m/z values.

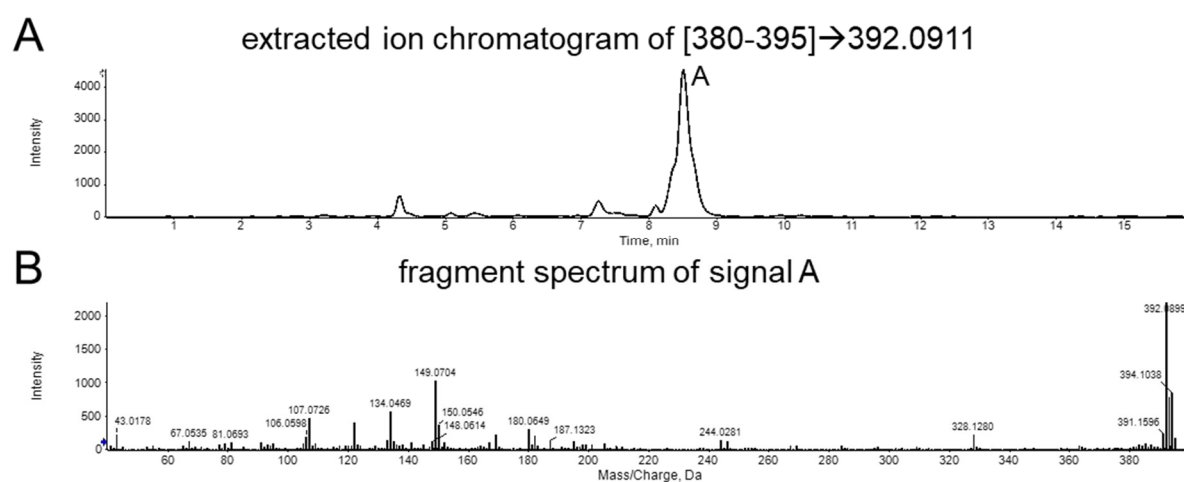

**Supplemental Figure S18.** Exemplary (A) extracted ion chromatogram and (B) fragment spectrum of a possible hydroxylated and carboxylated metabolite of omeprazole. The blue and white arrows on the y-axes indicate thresholds for presenting m/z values.

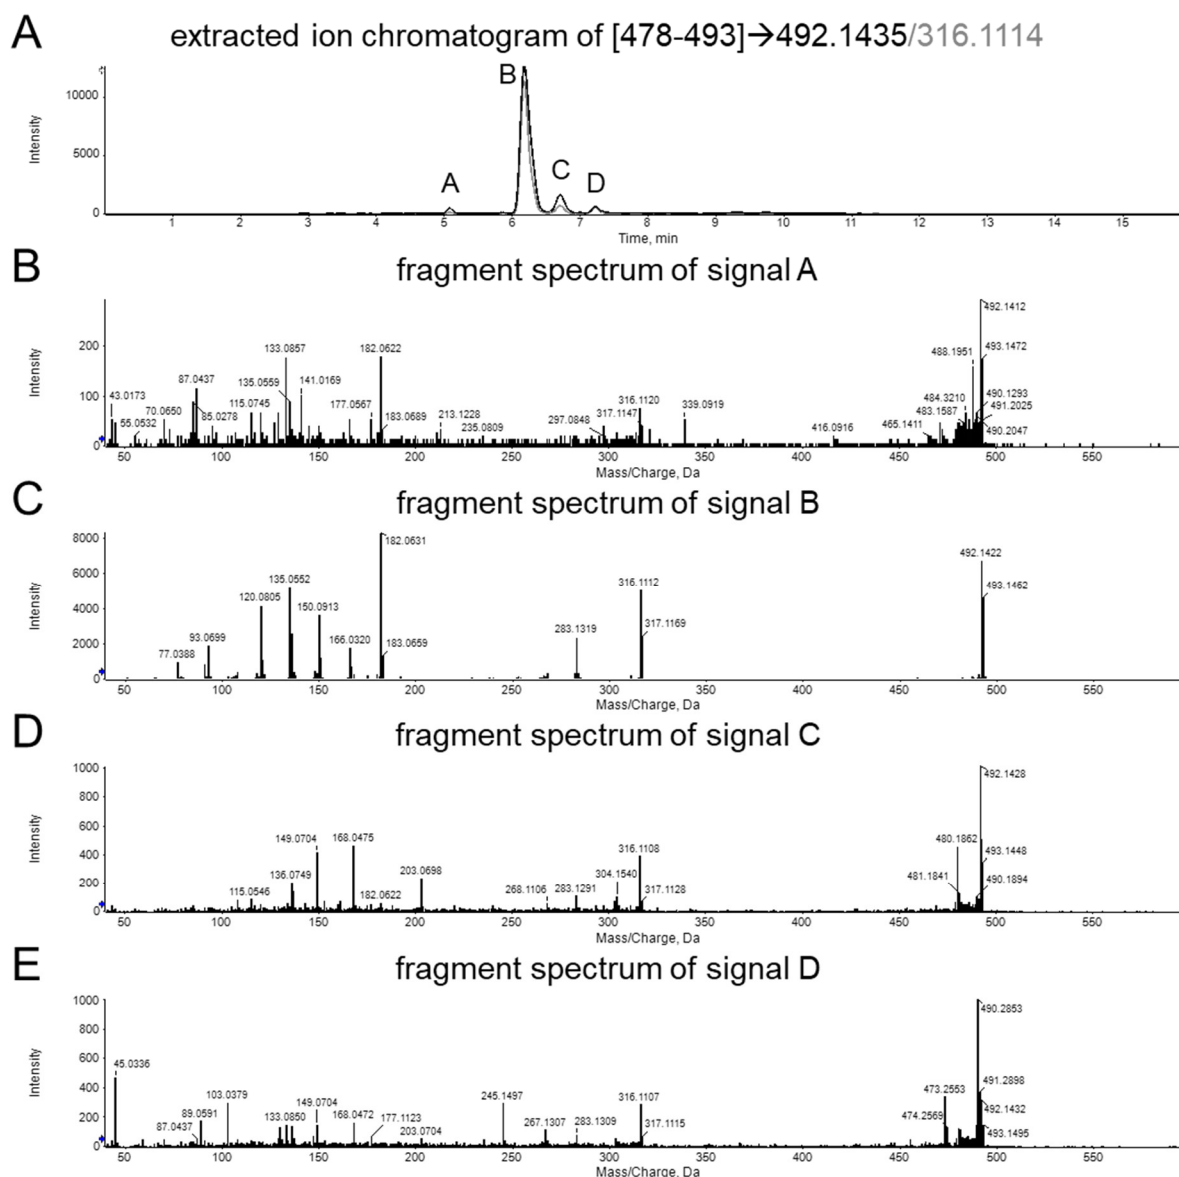

**Supplemental Figure S19.** Exemplary (A) extracted ion chromatogram and (B, C, D, E) fragment spectra of possible demethylated, dehydroxylated, and glucuronidated metabolites of omeprazole. The blue and white arrows on the y-axes indicate thresholds for presenting m/z values.

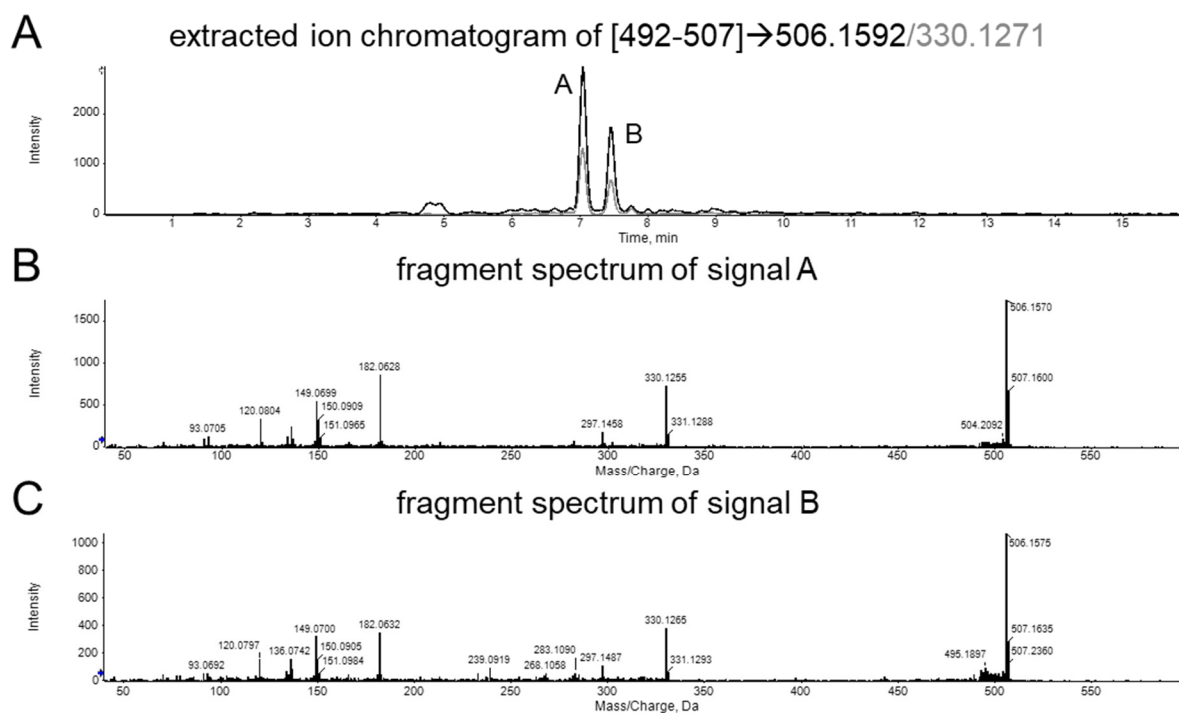

**Supplemental Figure S20.** Exemplary (A) extracted ion chromatogram and (B, C) fragment spectra of possible dehydroxylated and glucuronidated metabolites of omeprazole. The blue and white arrows on the y-axes indicate thresholds for presenting m/z values.

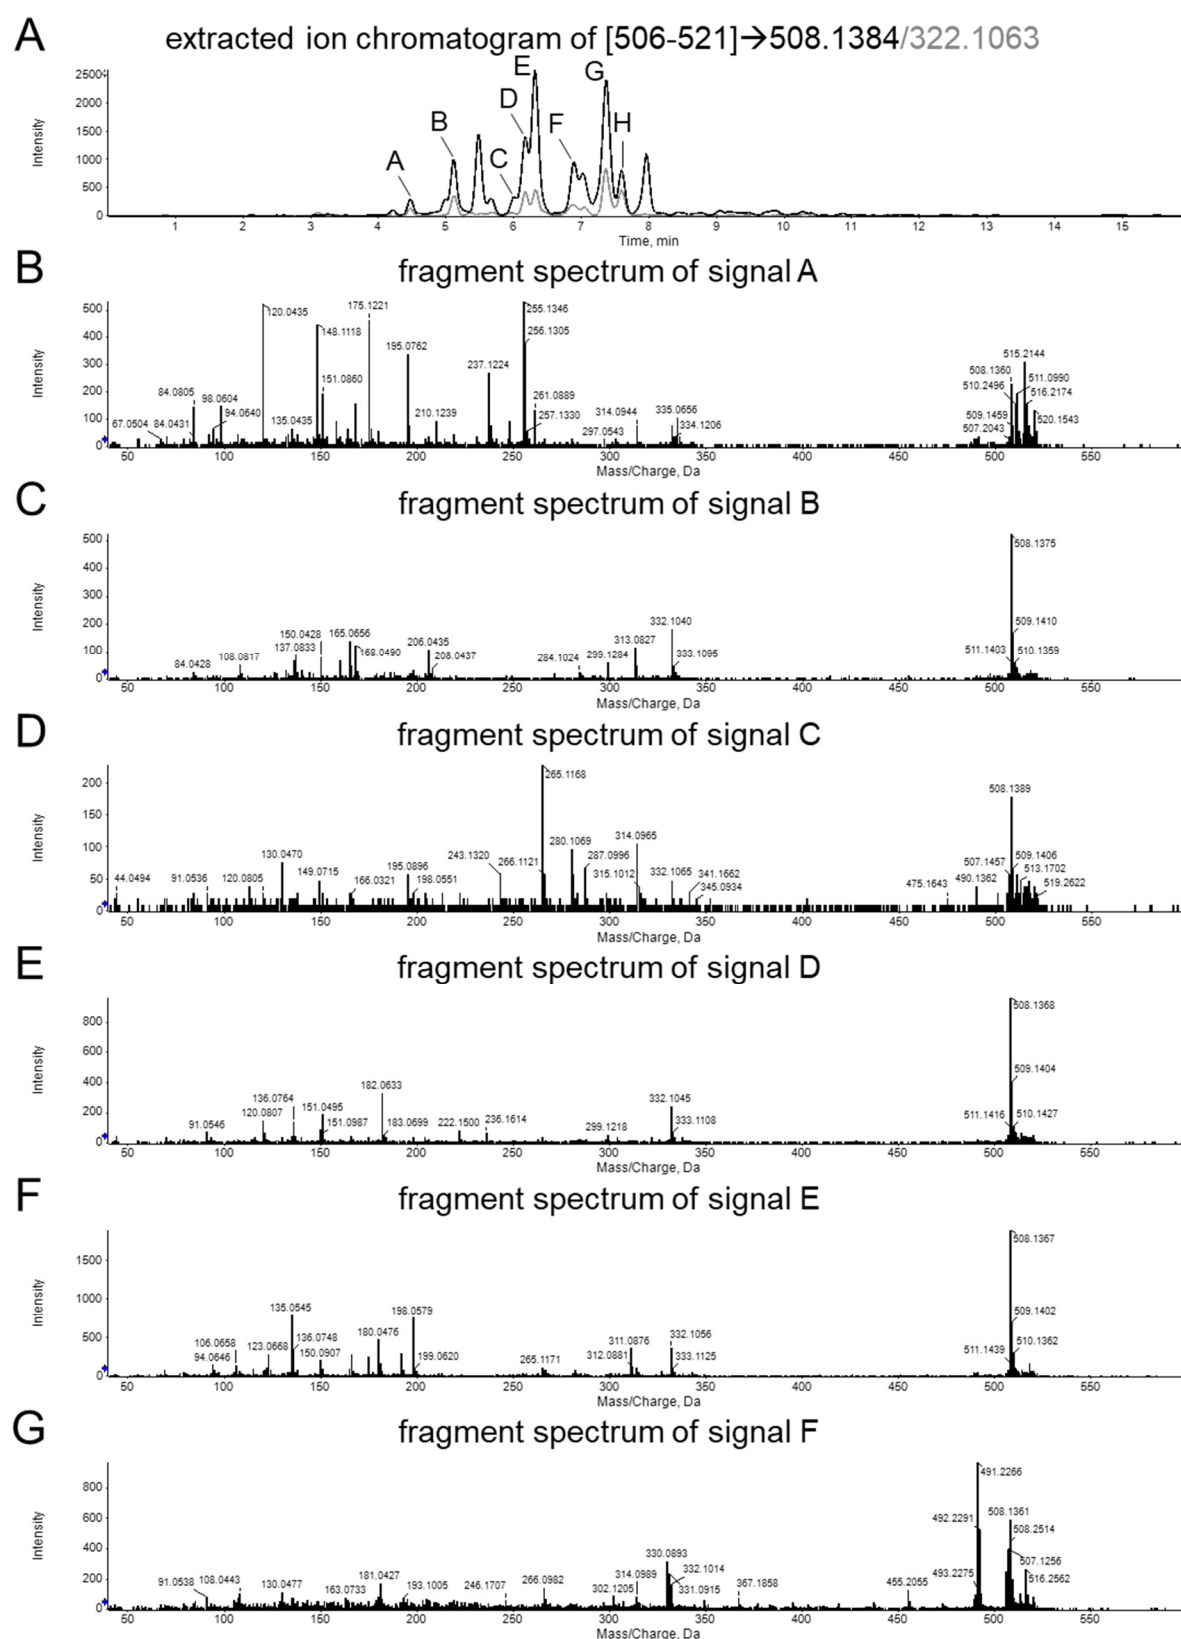

**Supplemental Figure S21.** Exemplary (A) extracted ion chromatogram and (B, C, D, E, F, G, H, I) fragment spectra of possible demethylated and glucuronidated metabolites of omeprazole. The blue and white arrows on the y-axes indicate thresholds for presenting m/z values.

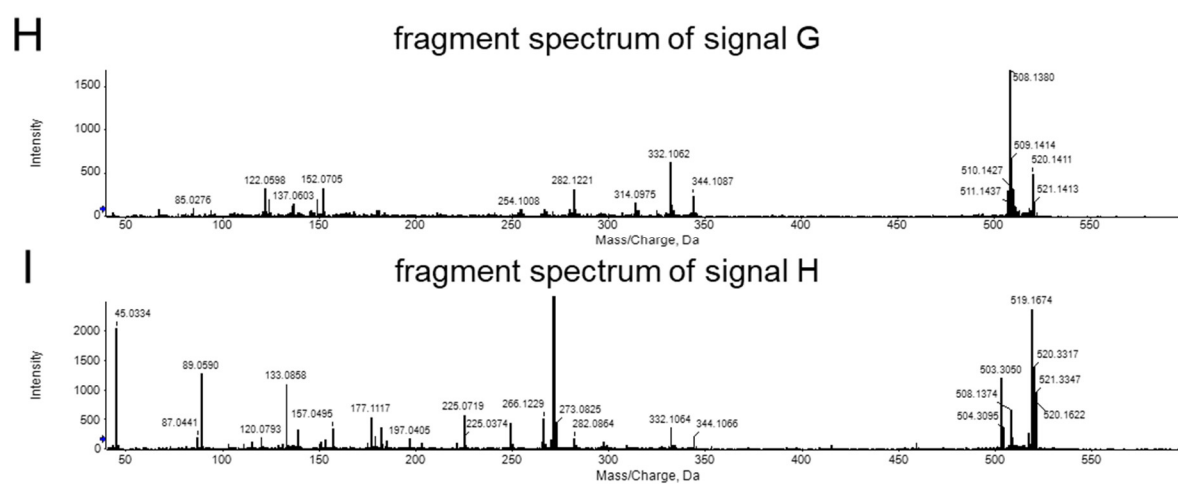Supplemental Figure S21. *Cont.*

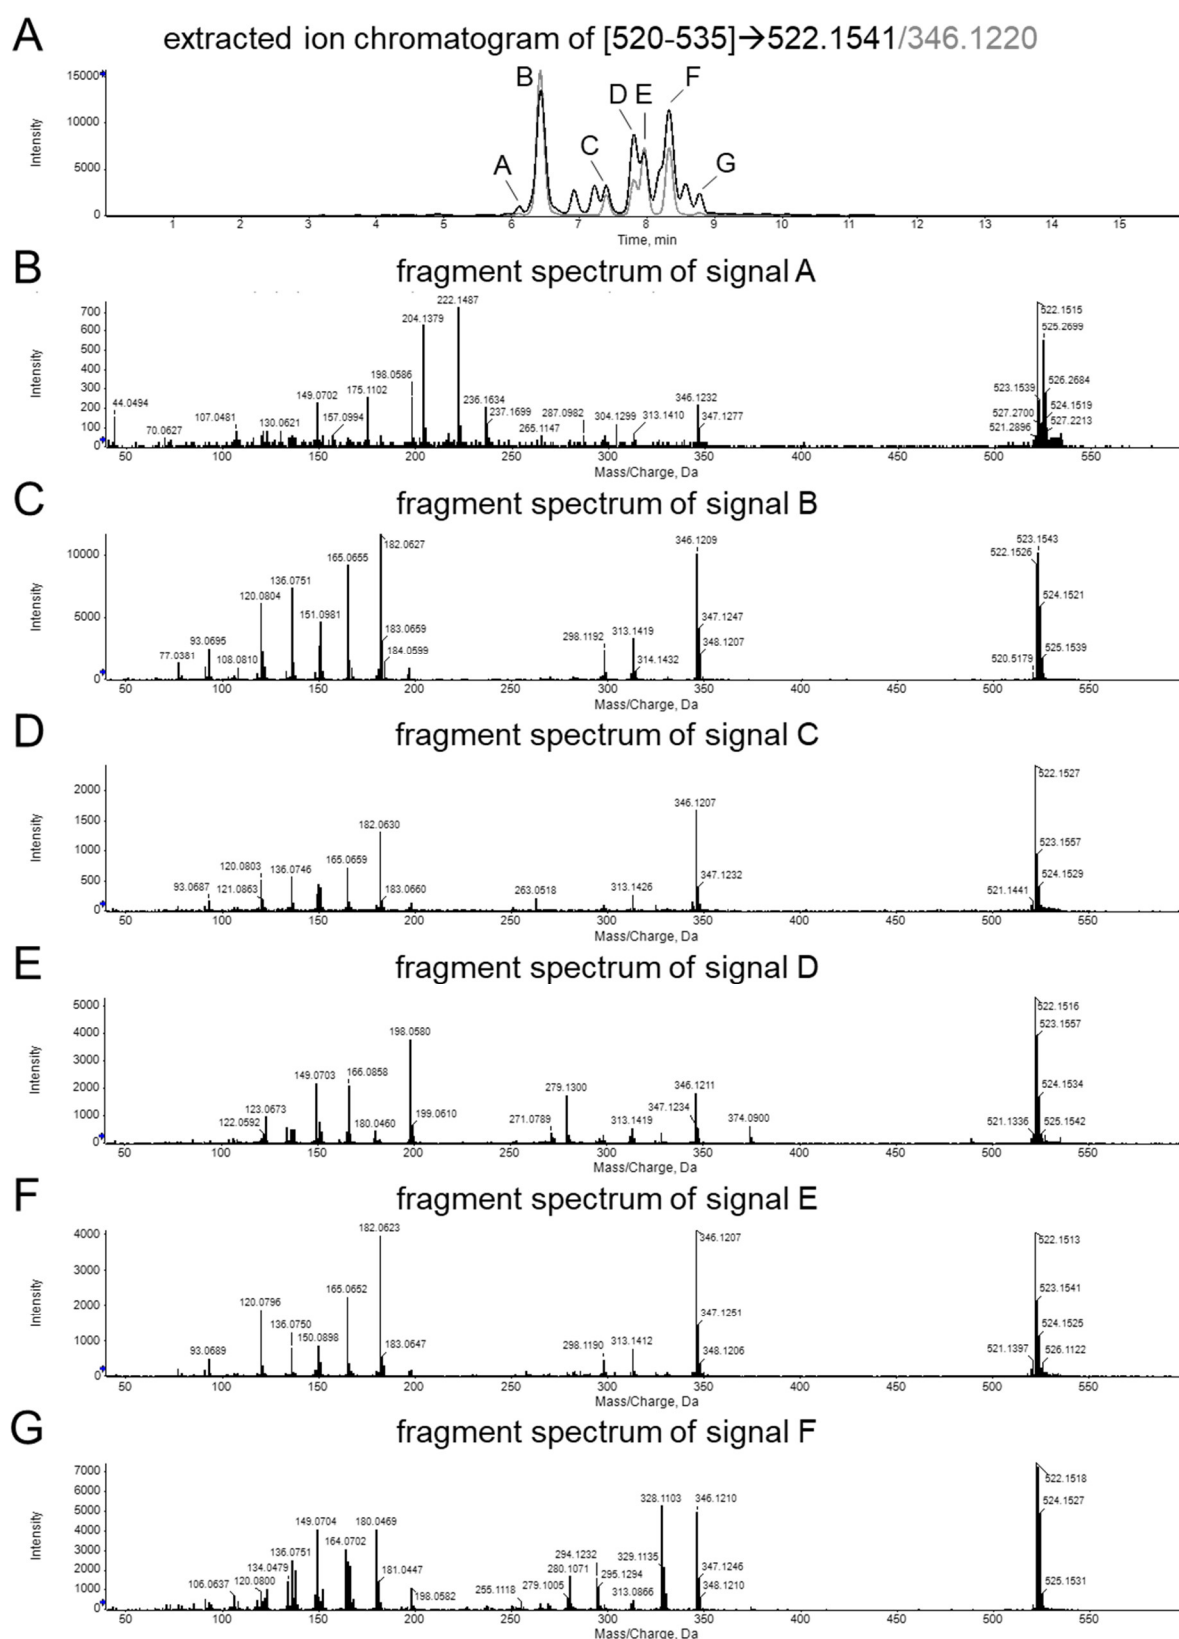

**Supplemental Figure S22.** Exemplary (A) extracted ion chromatogram and (B, C, D, E, F, G, H) fragment spectra of possible glucuronidated metabolites of omeprazole. The blue arrows on the y-axes indicate thresholds for presenting m/z values.



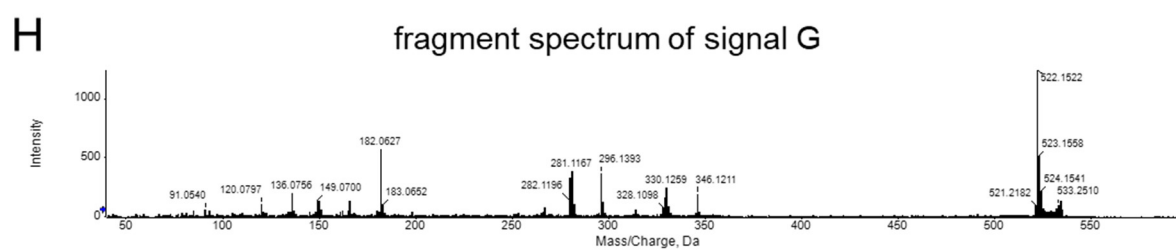

**Supplemental Figure S22.** *Cont.*

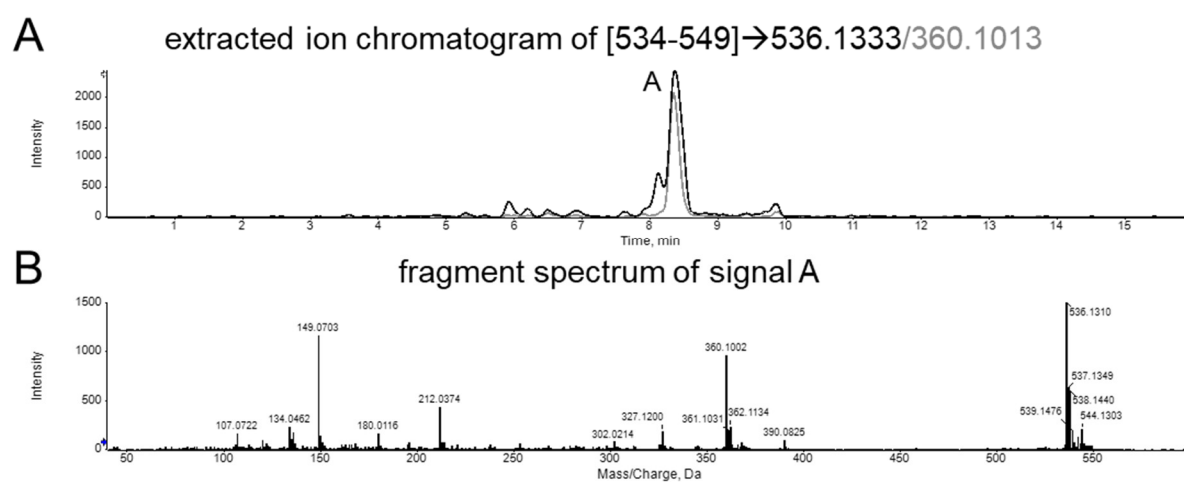

**Supplemental Figure S23.** Exemplary (A) extracted ion chromatogram and (B) fragment spectrum of a possible dehydroxylated, carboxylated, and glucuronidated metabolite of omeprazole. The blue and white arrows on the y-axes indicate thresholds for presenting m/z values.

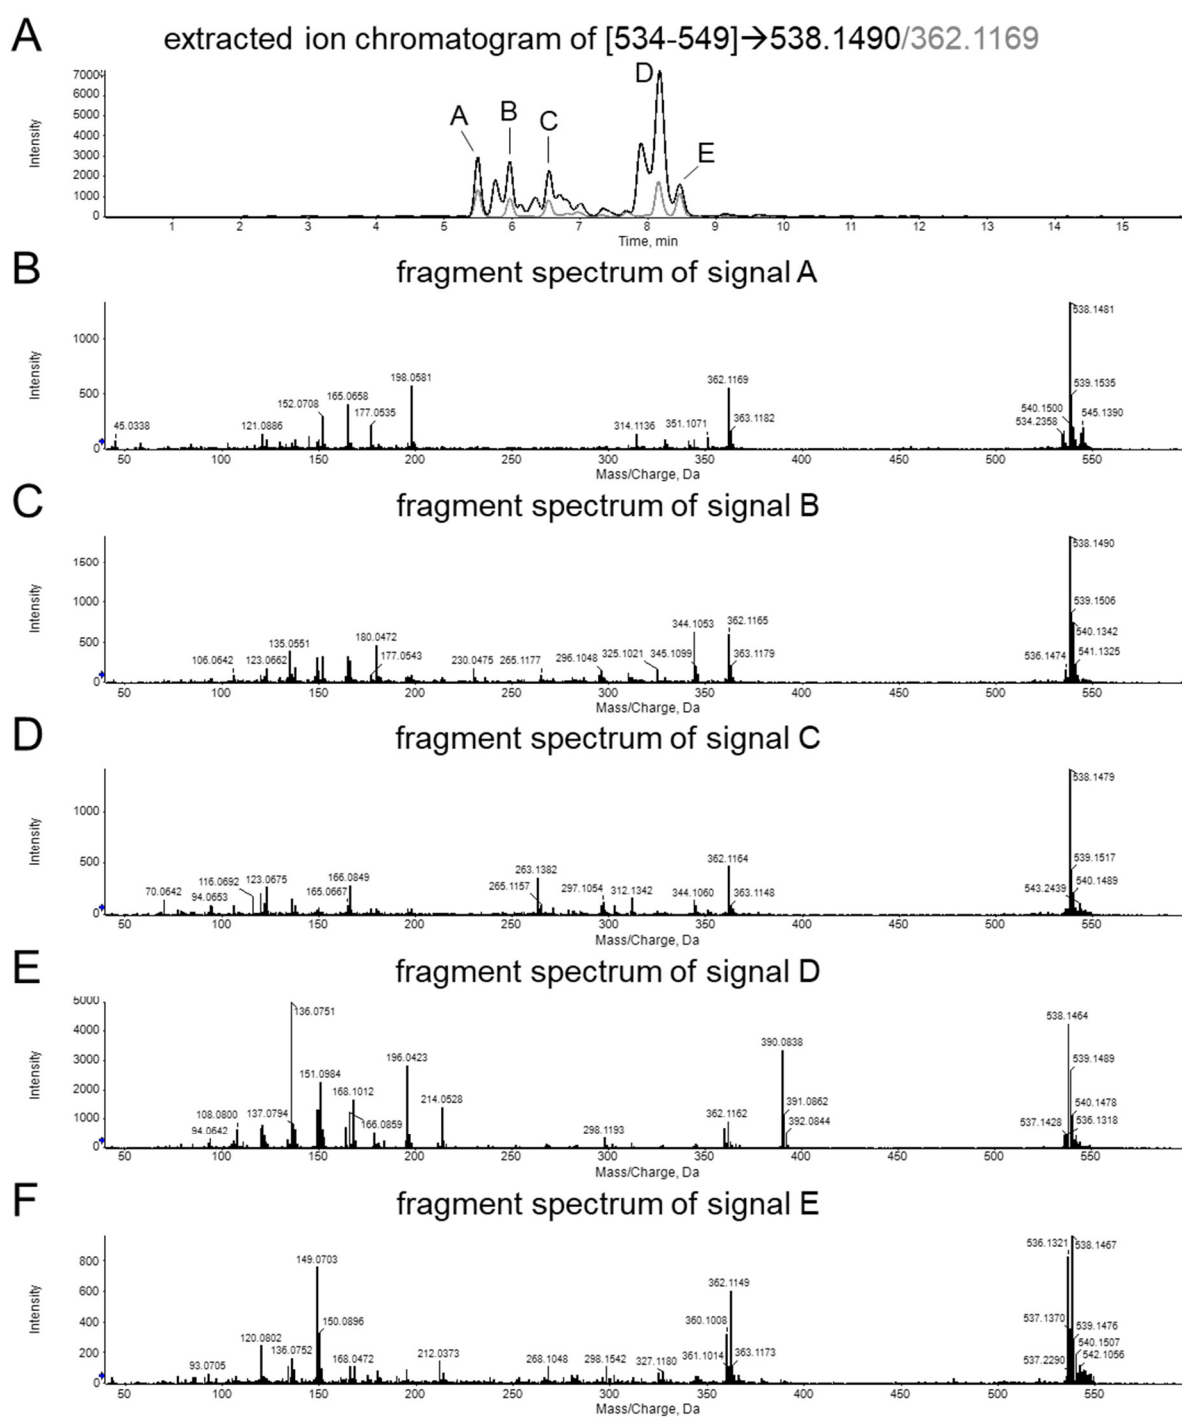

**Supplemental Figure S24.** Exemplary (A) extracted ion chromatogram and (B, C, D, E, F) fragment spectra of possible hydroxylated and glucuronidated metabolites of omeprazole. The blue and white arrows on the y-axes indicate thresholds for presenting m/z values.

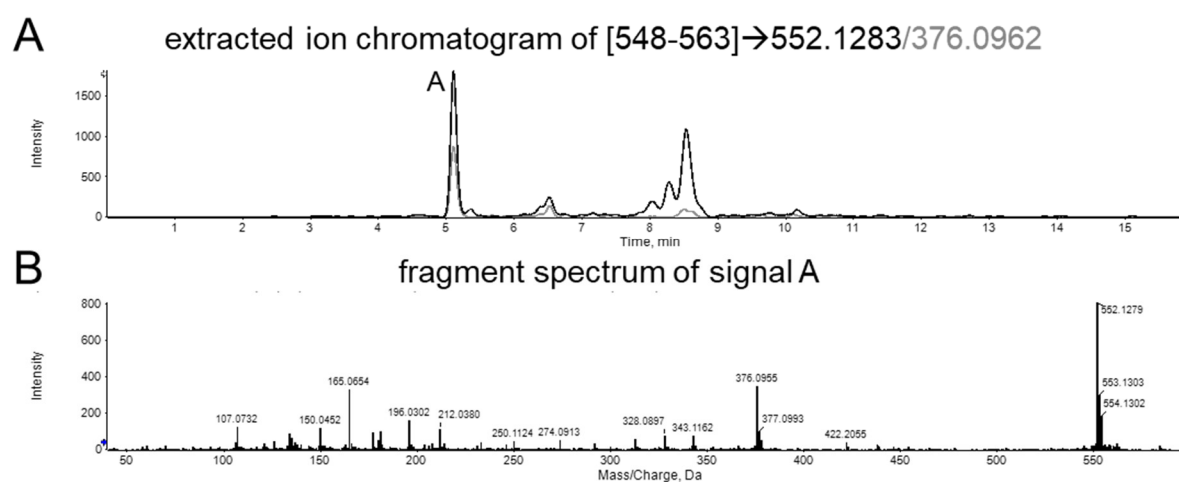

**Supplemental Figure S25.** Exemplary (A) extracted ion chromatogram and (B) fragment spectrum of a possible carboxylated and glucuronidated metabolite of omeprazole. The blue and white arrows on the y-axes indicate thresholds for presenting m/z values.

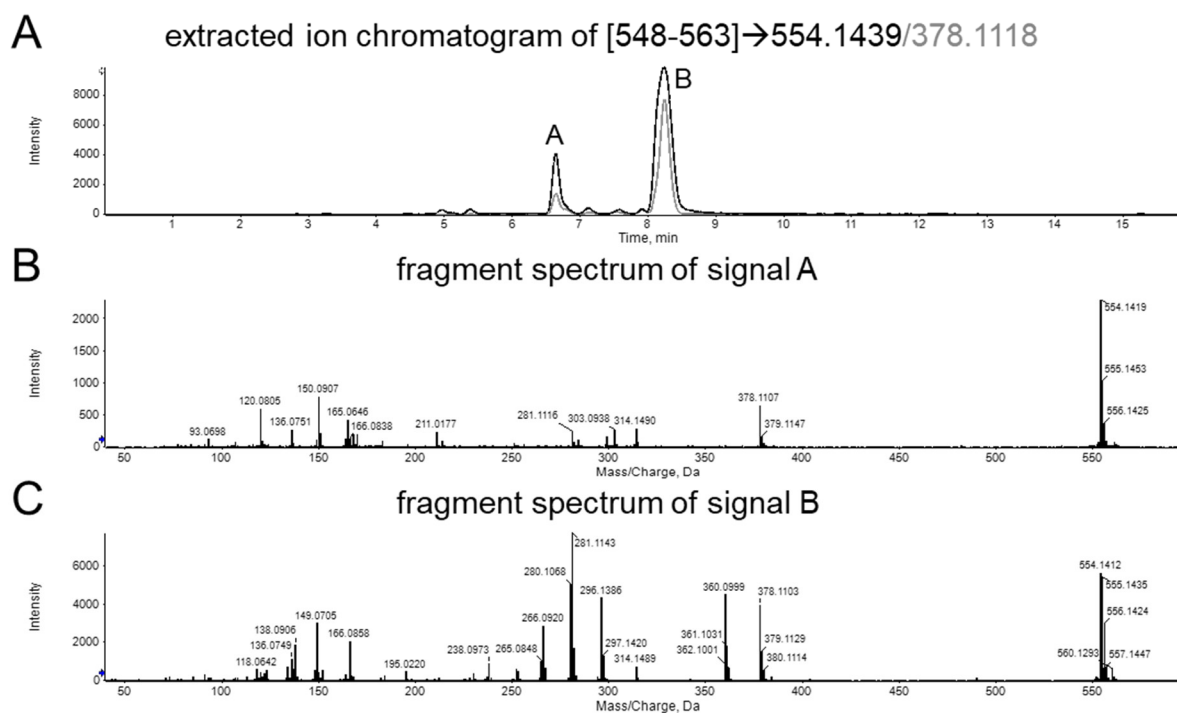

**Supplemental Figure S26.** Exemplary (A) extracted ion chromatogram and (B, C) fragment spectra of possible dihydroxylated and glucuronidated metabolites of omeprazole. The blue and white arrows on the y-axes indicate thresholds for presenting m/z values.
